# Supplementary material for: Human RAP1 specifically protects telomeres of senescent cells from DNA damage
Source: PubMed Central journal article supplement (PMC7132343; doi:10.15252/embr.201949076), 2020-02-25

# Figure 1

a

RAP1

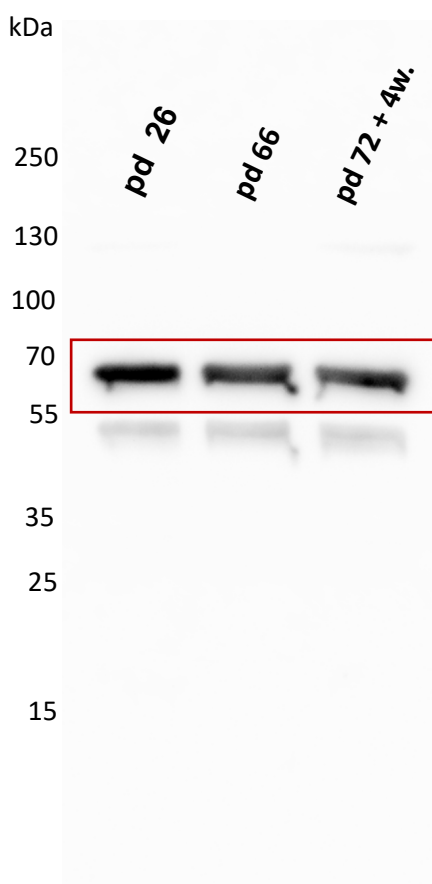

Tubulin

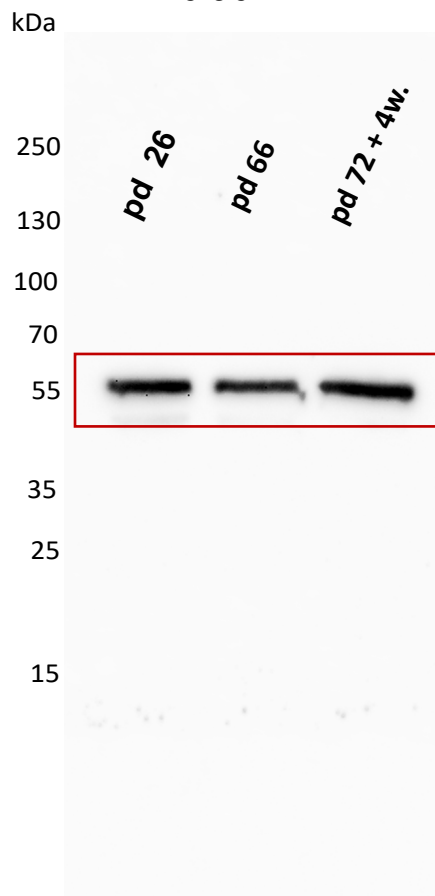

TRF2

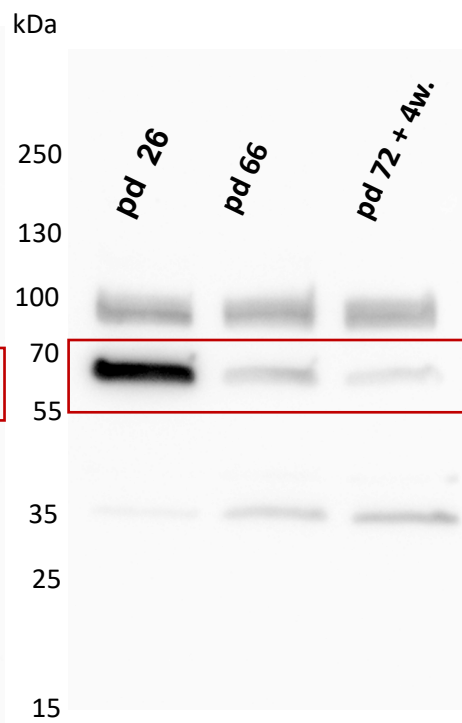

# Figure 1

b

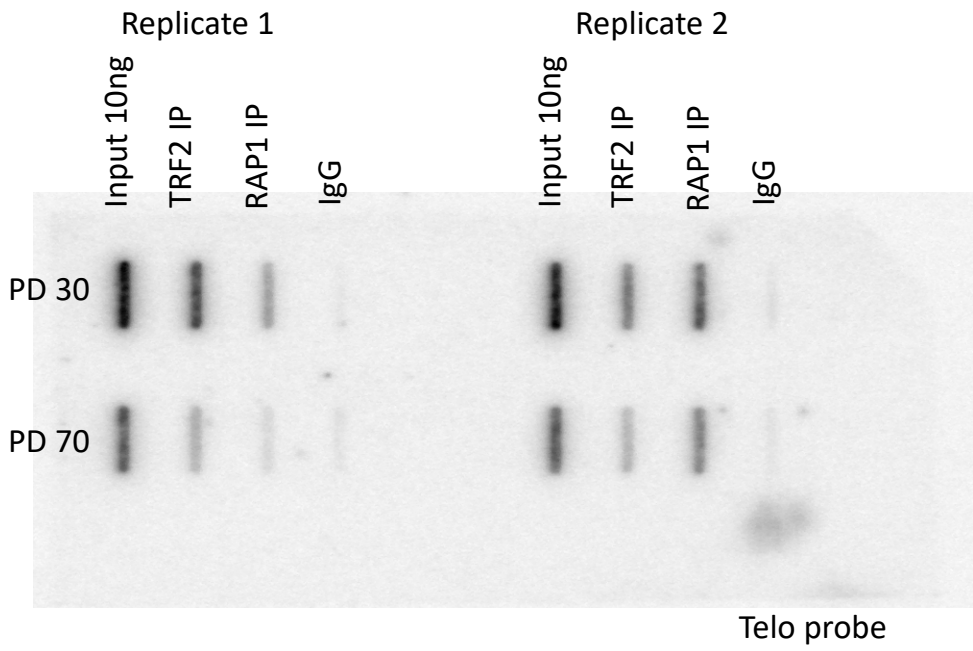

Replicate 3

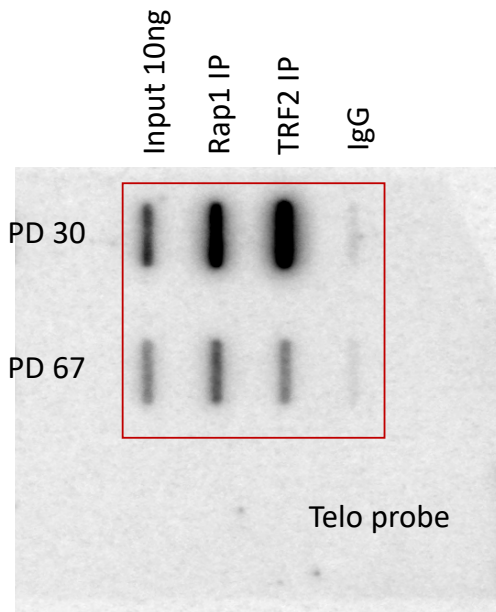

Replicate 1

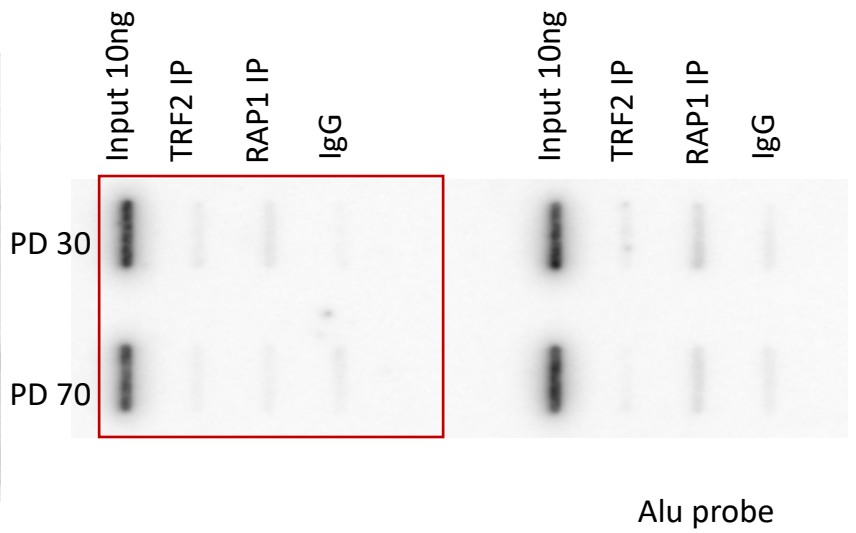

# Figure 2

a-b Replicate 1 (as in the main Figure)

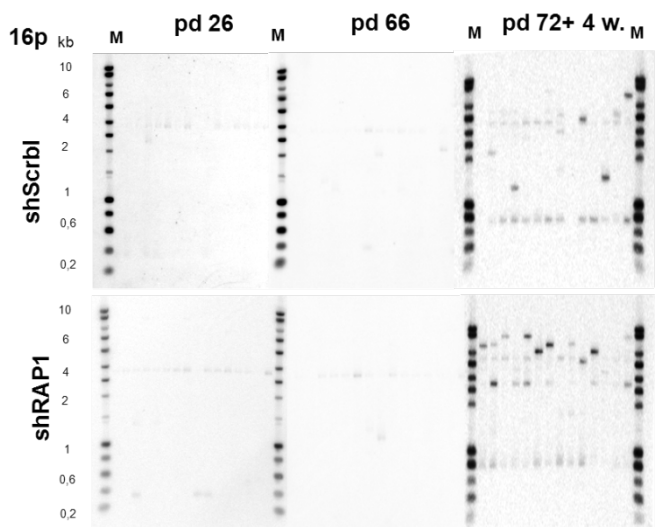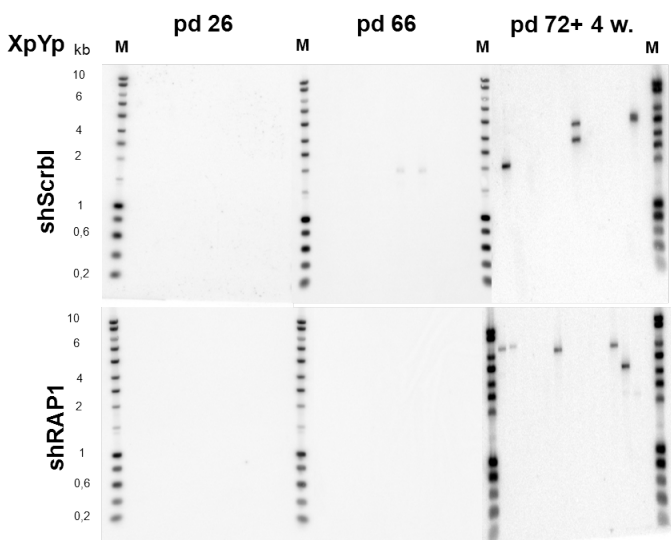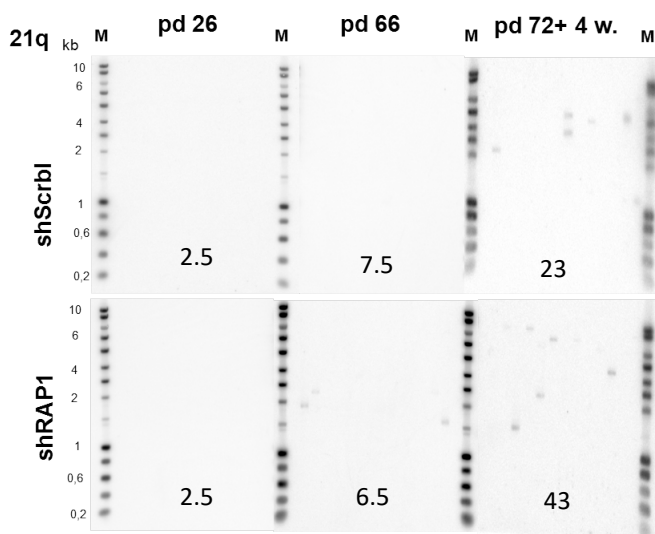

# Figure 2

## a-b Replicate 2

16 probe

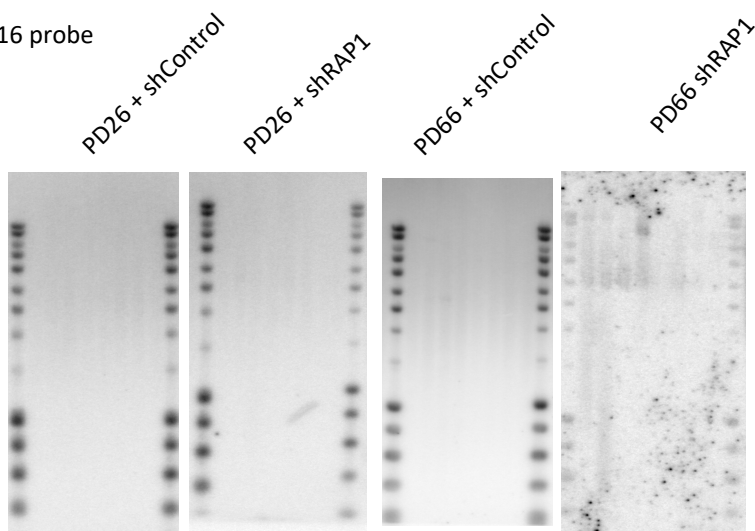

pd 72+4w. +shControl

pd 72+4w. +shRAP1

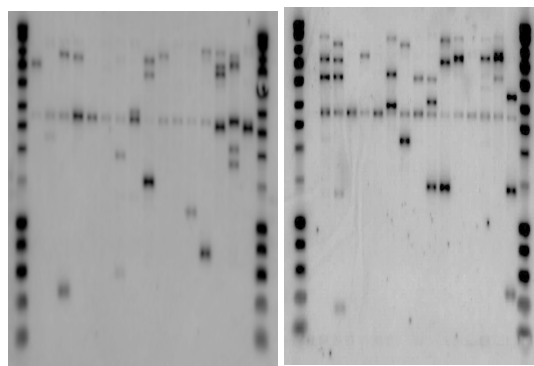

21 probe

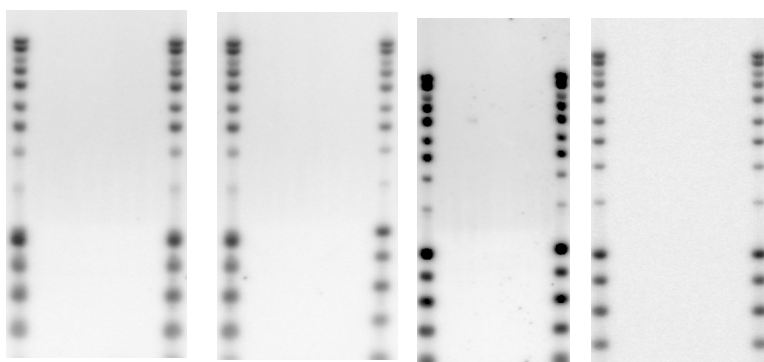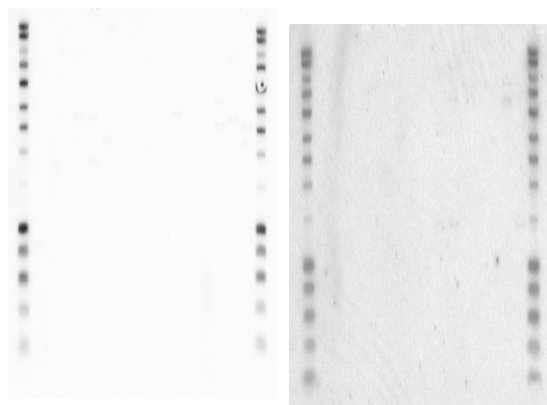

X probe

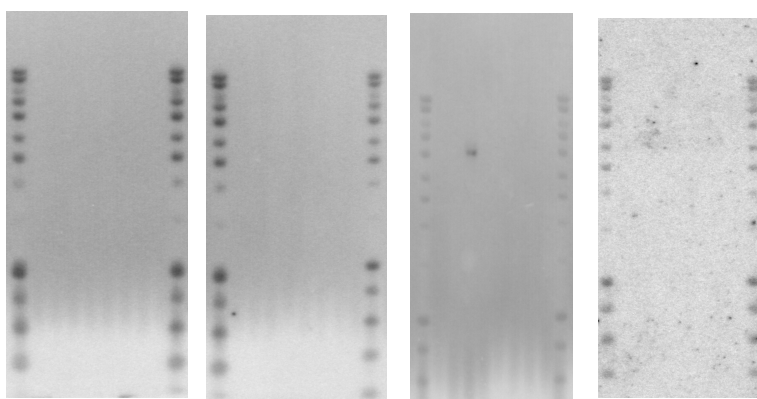

0

0

7.5

7.5

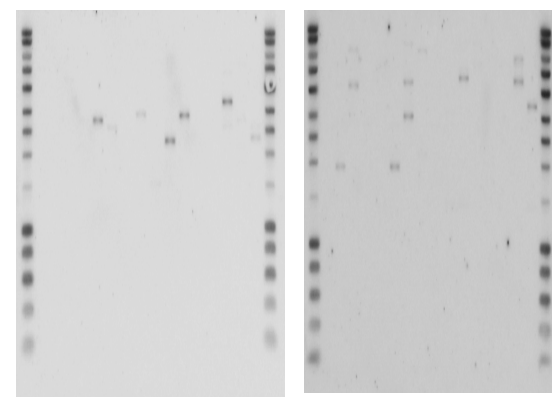

22

37.5

# Figure 2

## a-b Replicate 3

16 probe

PD26 + shControl

PD26 + shRAP1

PD66 + shControl

PD66 shRAP1

pd 72+4w. +shControl

pd 72+4w. +shRAP1

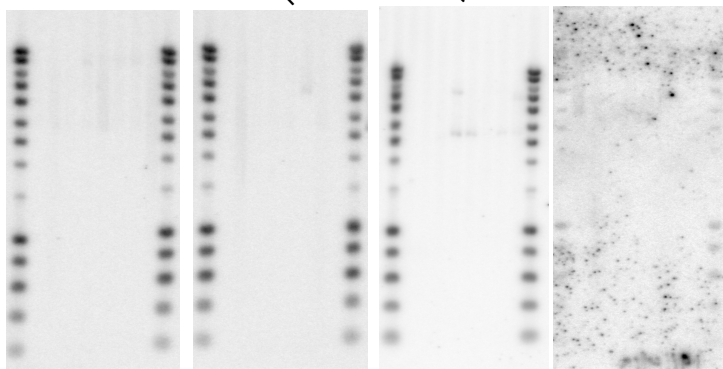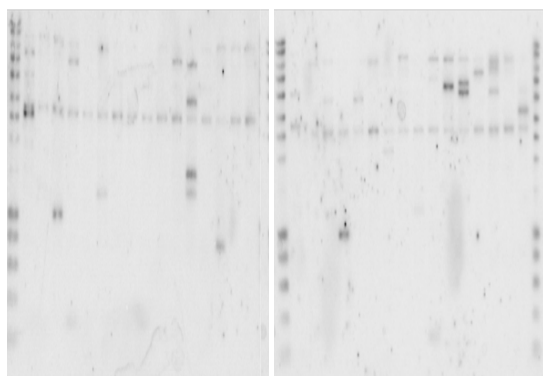

21 probe

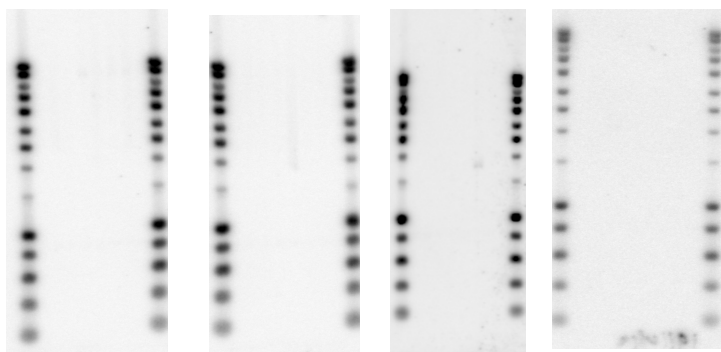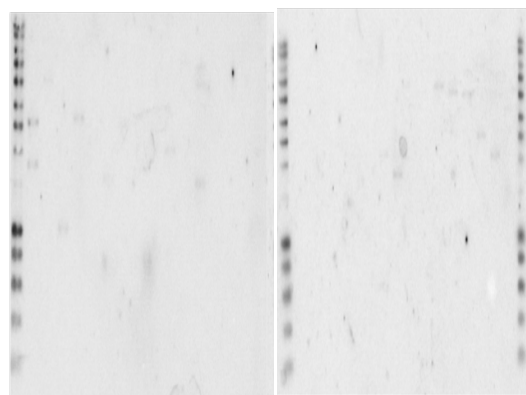

X probe

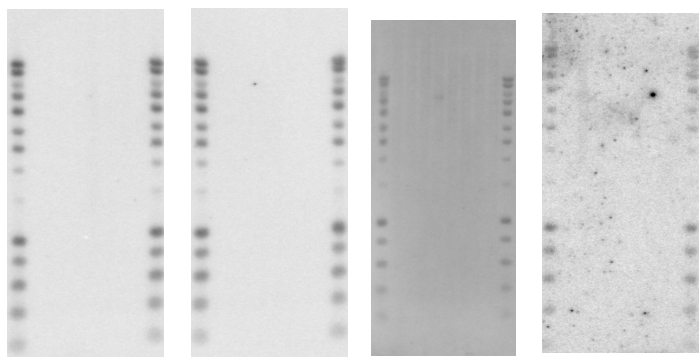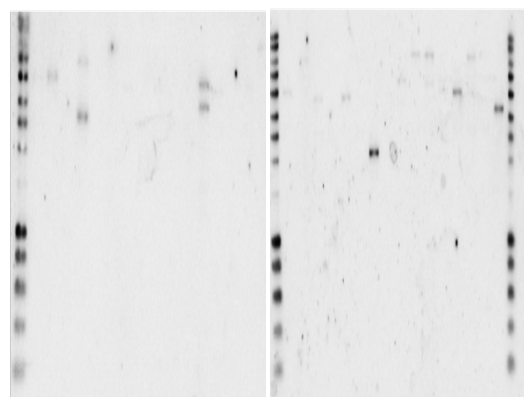

5

5

10

2.5

20

35

# Figure 2

## c-d Replicate 1

16p

shRAP1+shLIG3

shRAP1+shLIG4

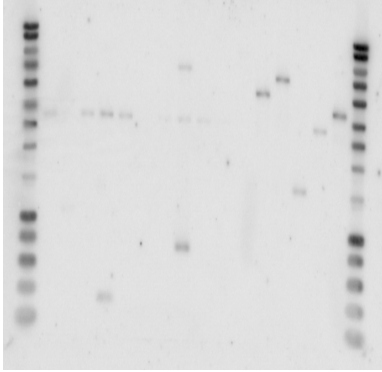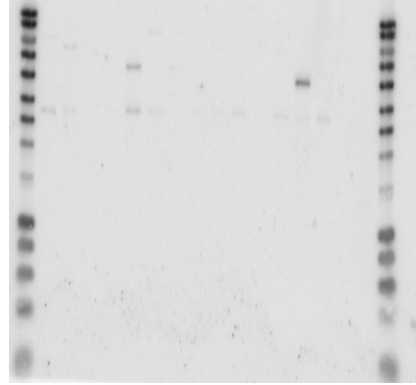

21q

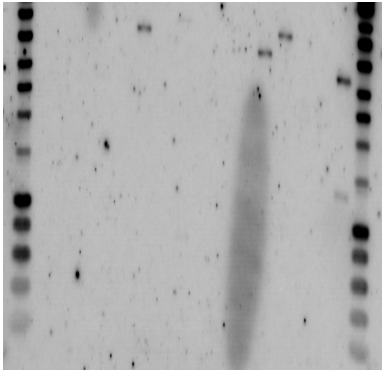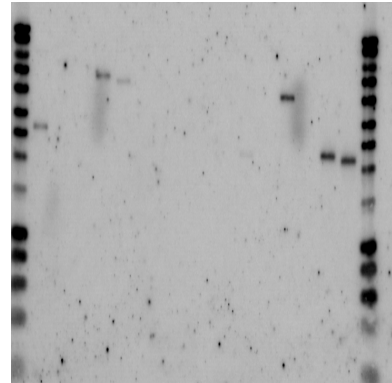

XpYp

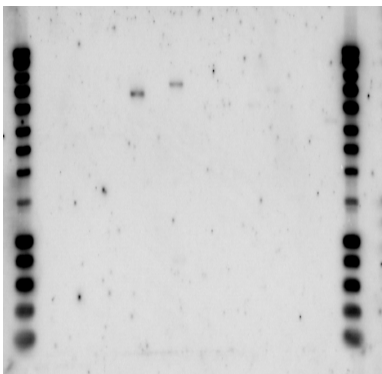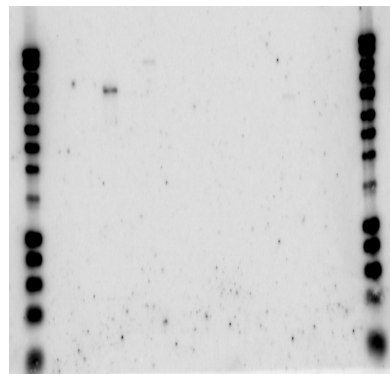

35

22.5

25 ng of DNA per 1 PCR

# Figure 2

## Replicate 2

16 probe

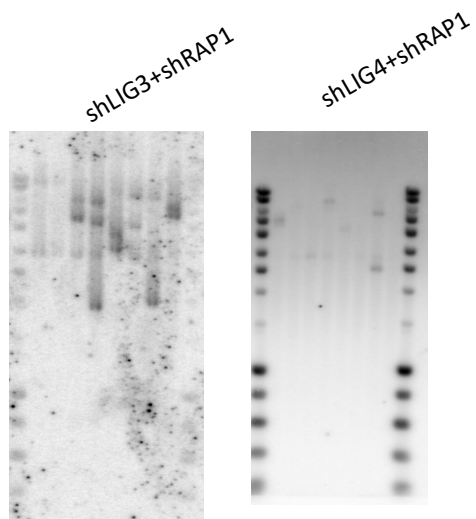

21 probe

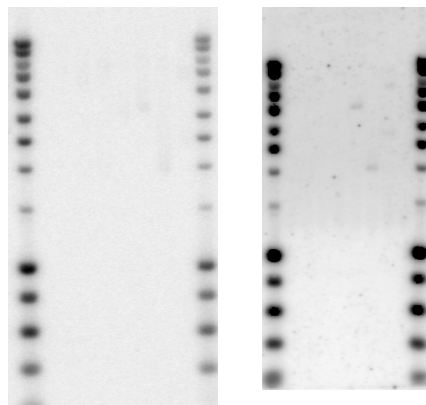

X probe

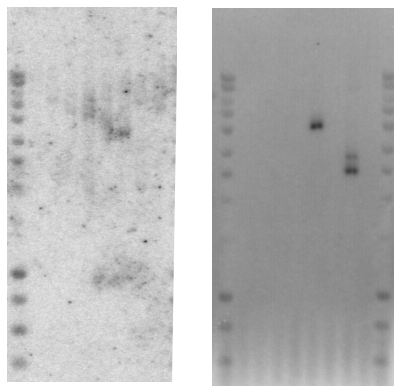

27.5

20

# Figure 2

## Replicate 3

16 probe

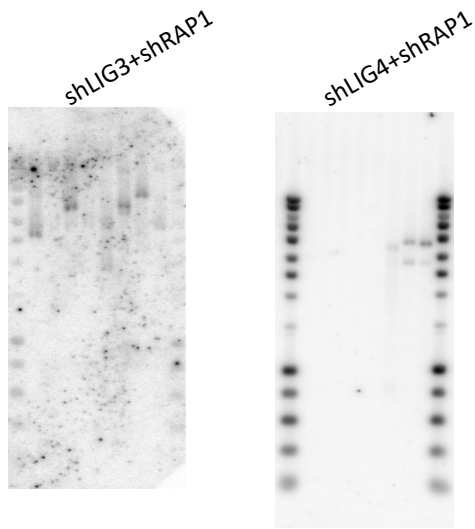

21 probe

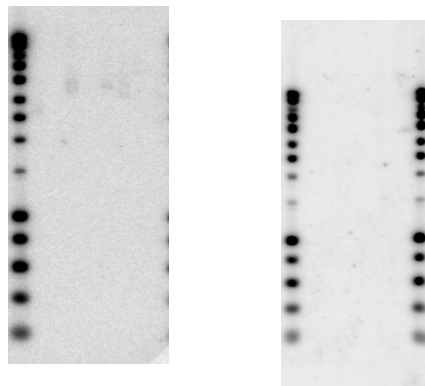

X probe

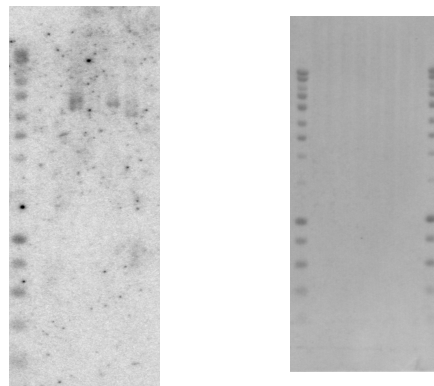

30

15



# Figure 2

16 probe

Replicate 1

Replicate 2

Replicate 3

shLIG3

shLIG3

shLIG3

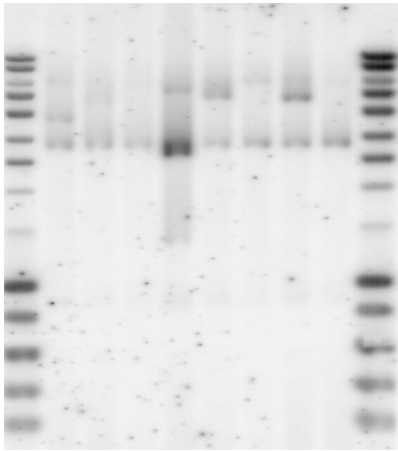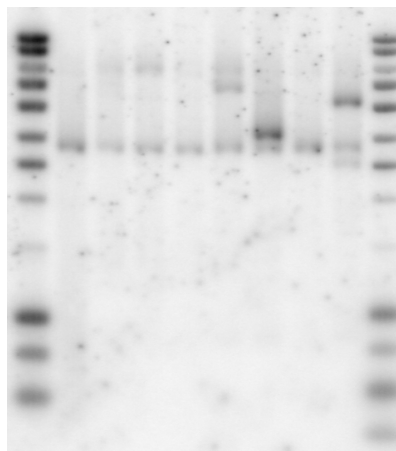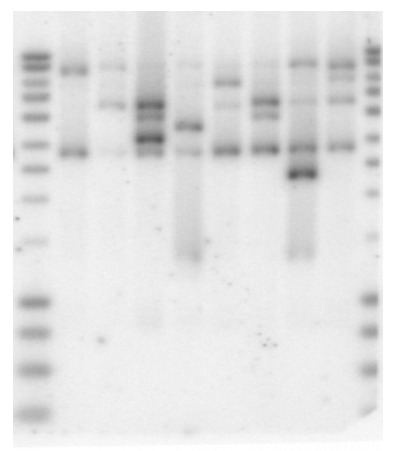

21 probe

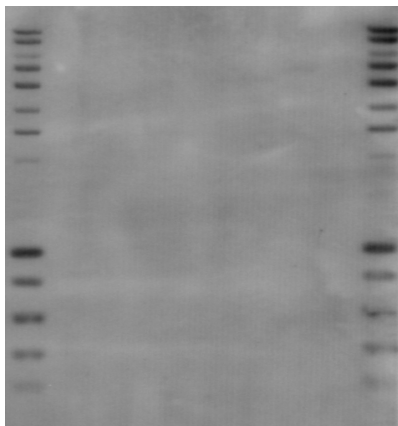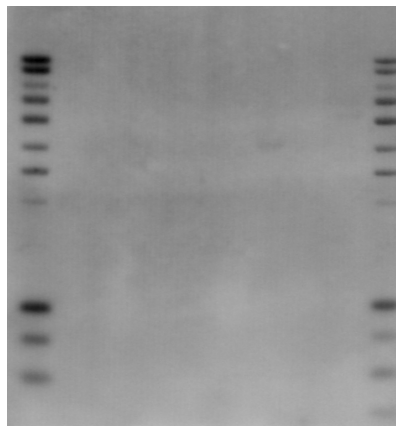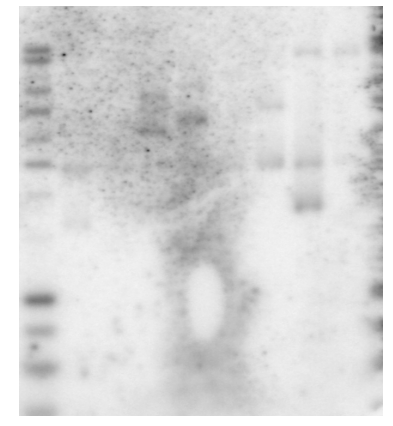

X probe

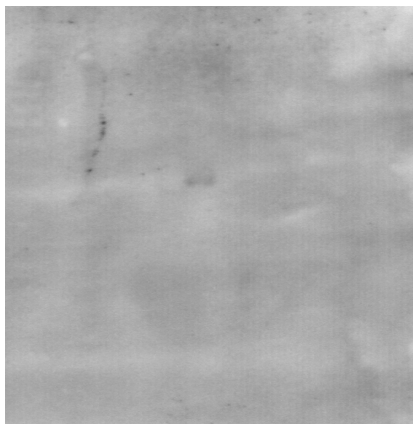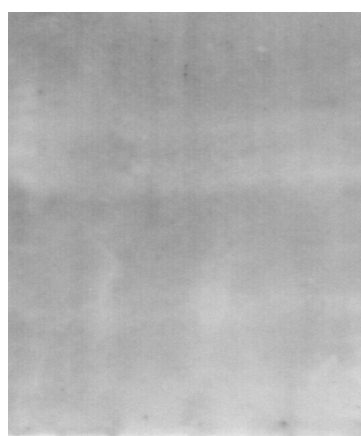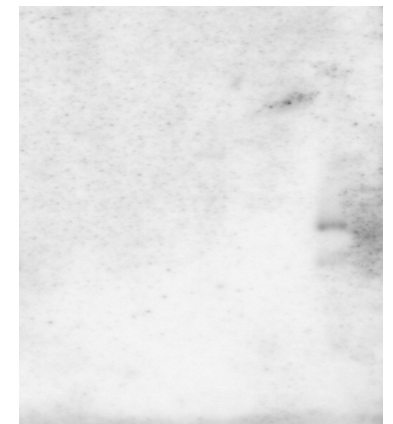

15

17.5

25

# Figure 2

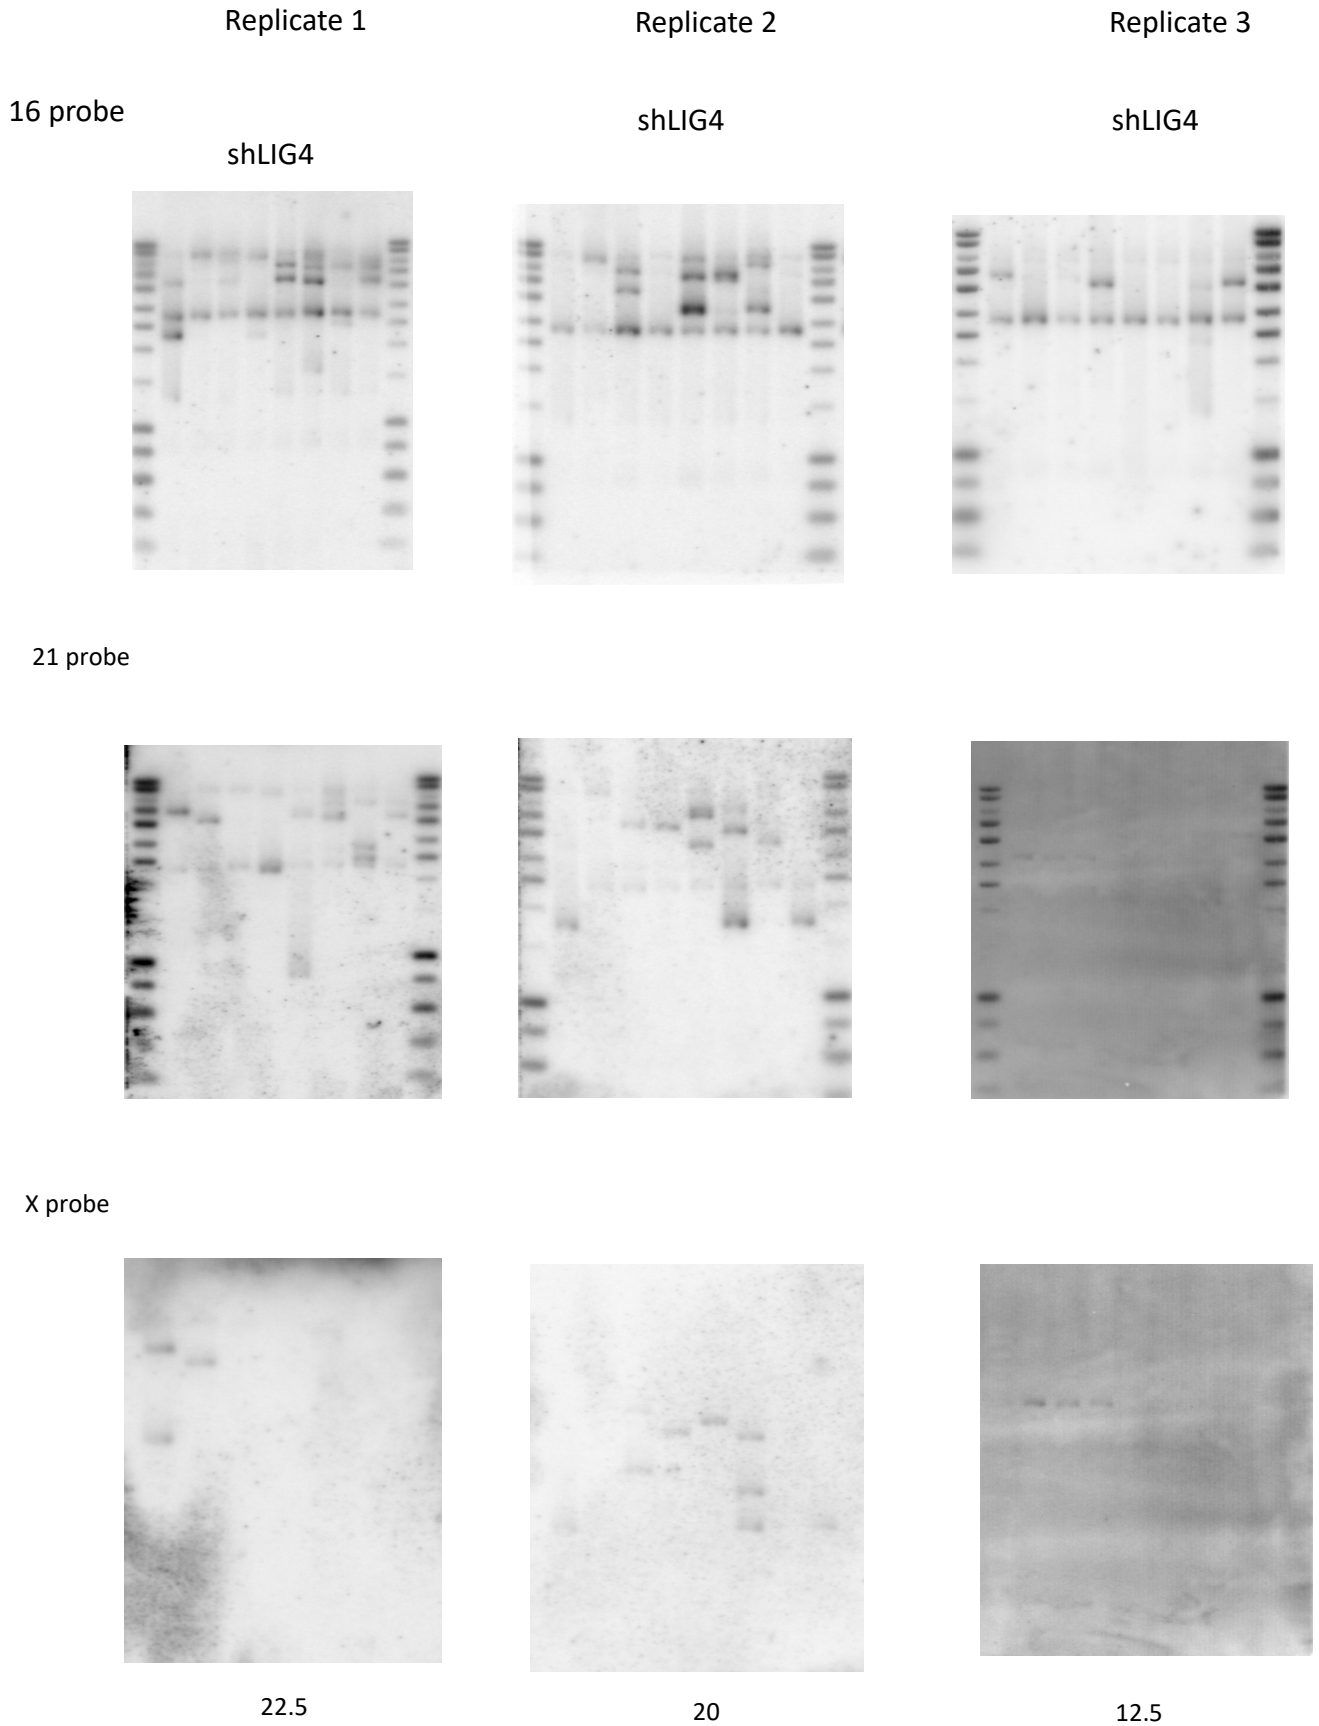

# Figure 2

16 probe

Replicate 1

siRAP1

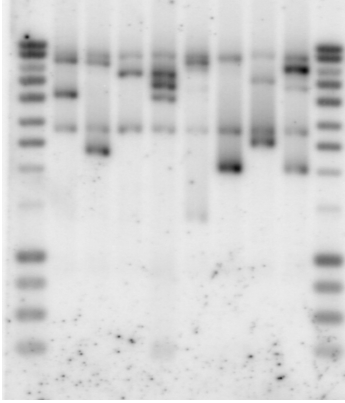

Replicate 2

siRAP1

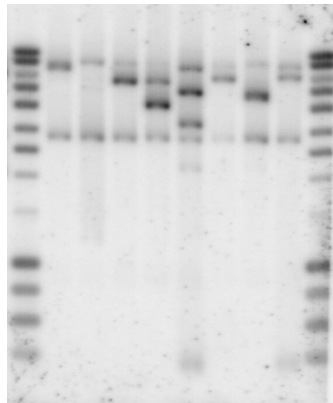

Replicate 1

siLIG3 + shRAP1

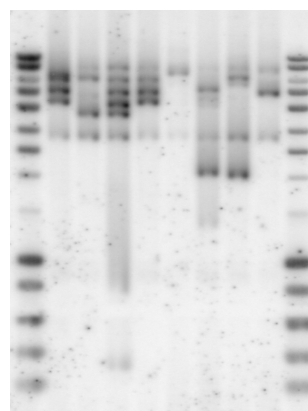

Replicate 2

siLIG3 + shRAP1

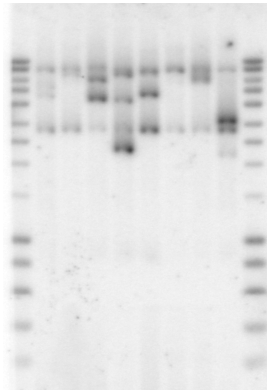

21 probe

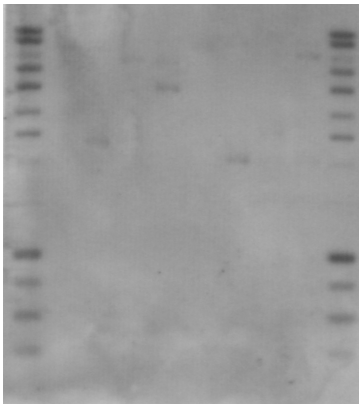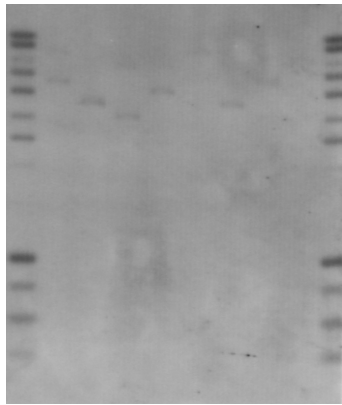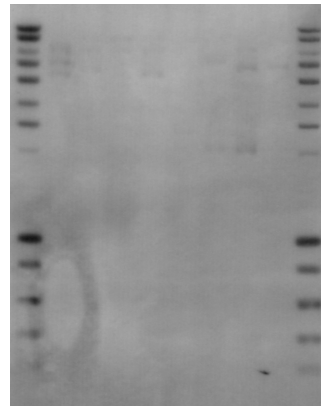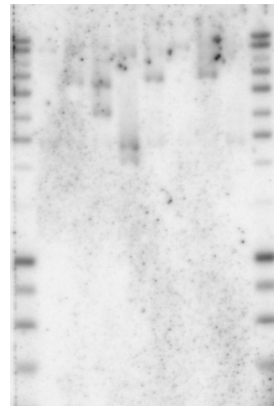

X probe

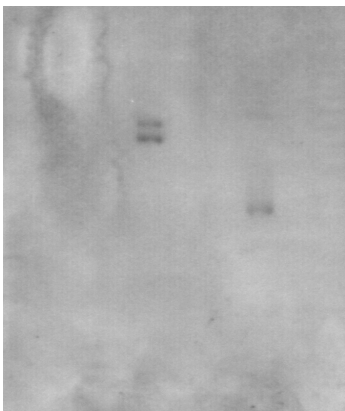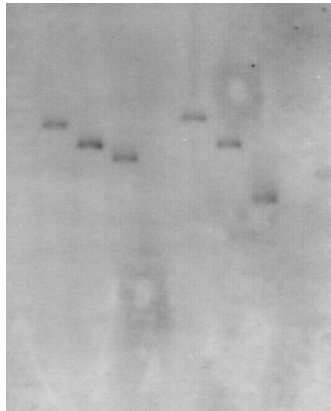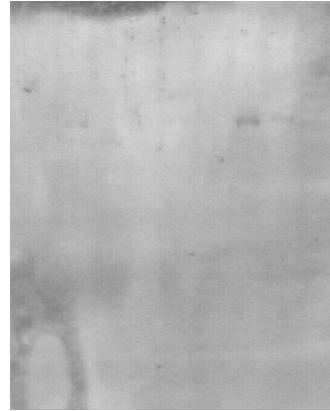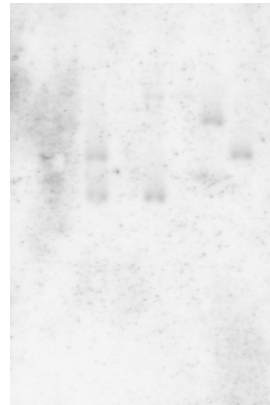

32.5

35

32.5

35

# Figure 2

16 probe

Replicate 1

Replicate 2

Replicate 3

siLIG4 + shRAP1

siLIG4 + shRAP1

siLIG4 + shRAP1

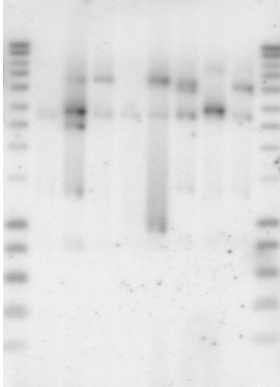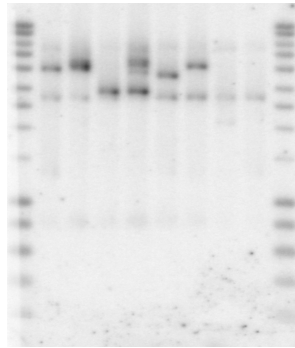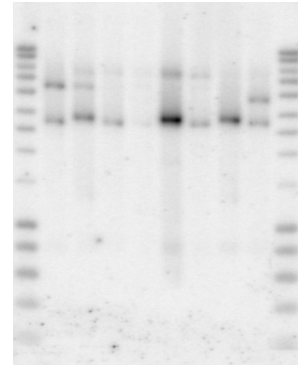

21 probe

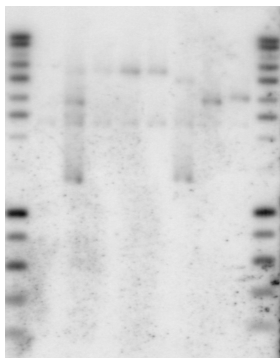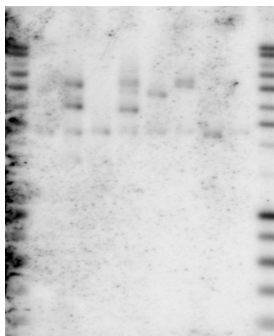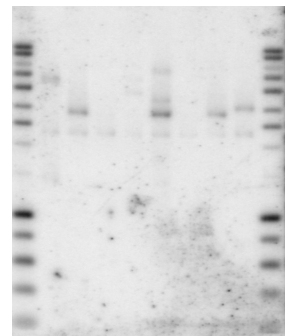

X probe

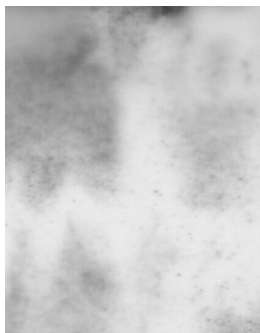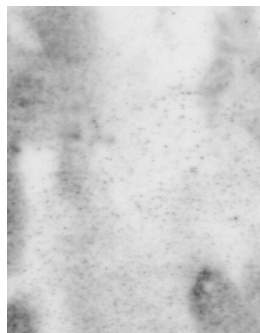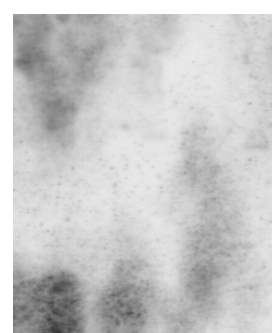

22.5

17.5

15

# Figure 2

## Replicate 1

16 probe

$\Delta$ RCT+shRAP1

shRAP1 +  $\Delta$ MYB

shRAP1 + RAP1

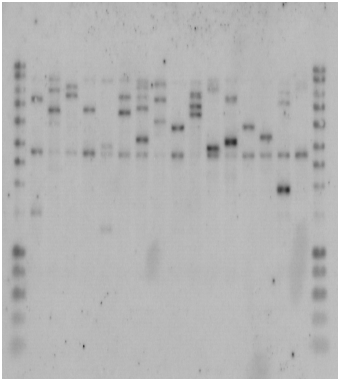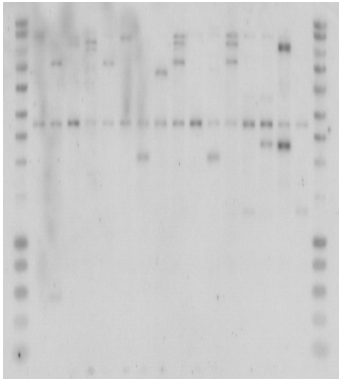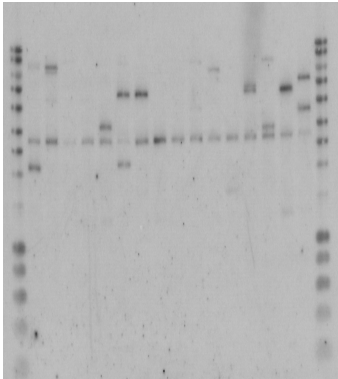

21 probe

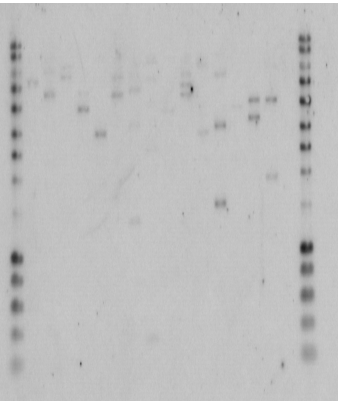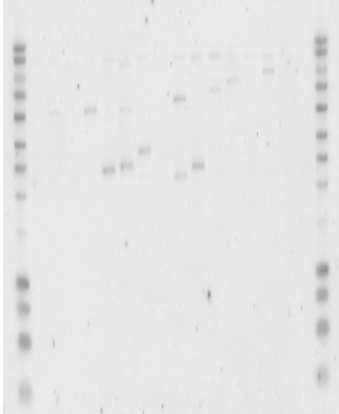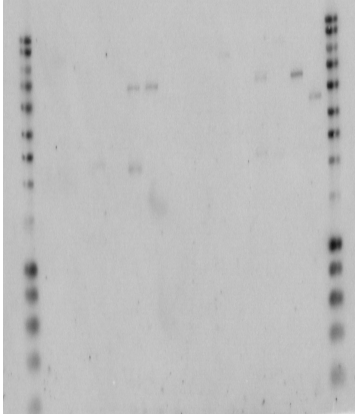

X probe

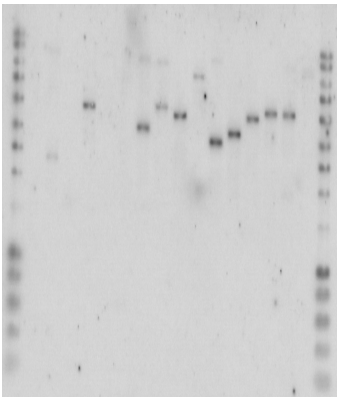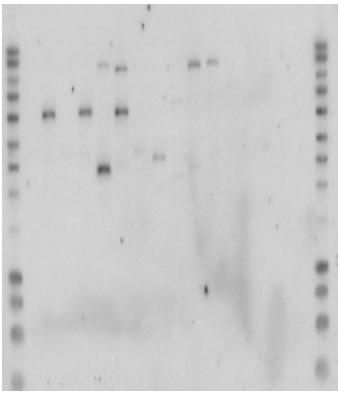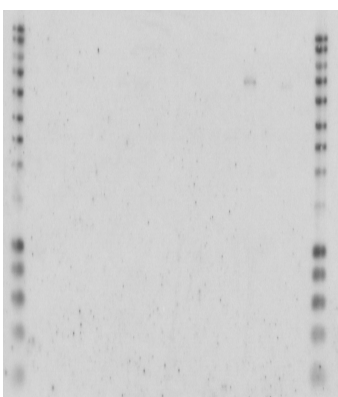

45

25

20

# Figure 2

## Replicate 2

16 probe

$\Delta$ RCT+shRAP1

shRAP1 +  $\Delta$ MYB

shRAP1 + RAP1

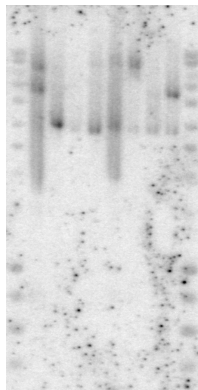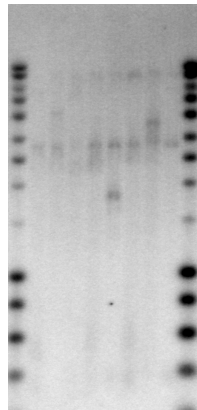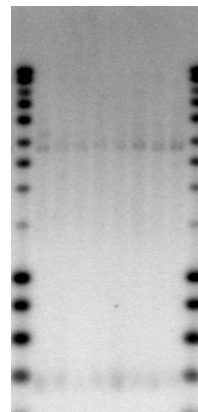

21 probe

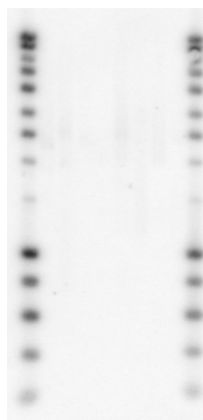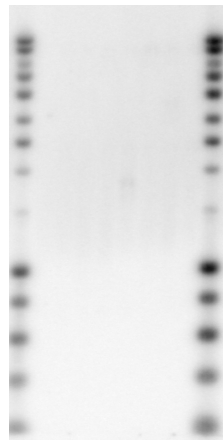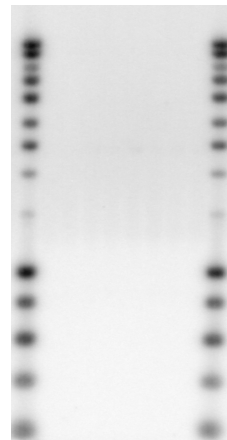

X probe

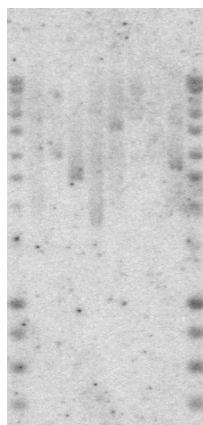

30

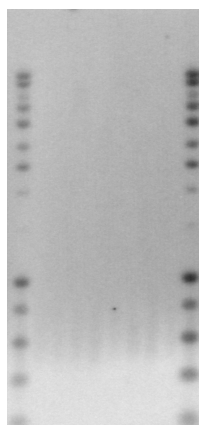

12.5

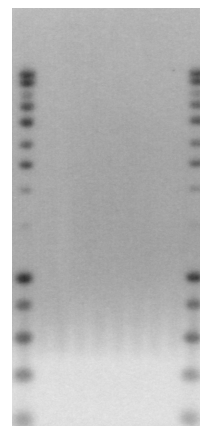

10

# Figure 2

## e-f Replicate 3

16 probe

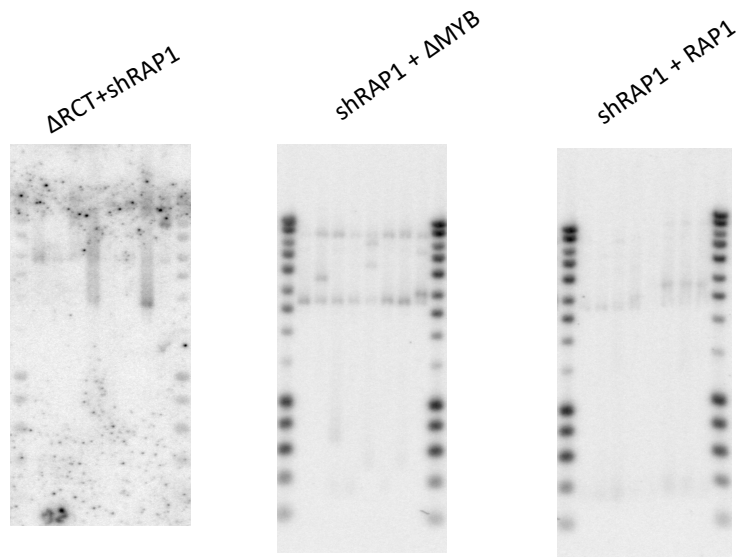

21 probe

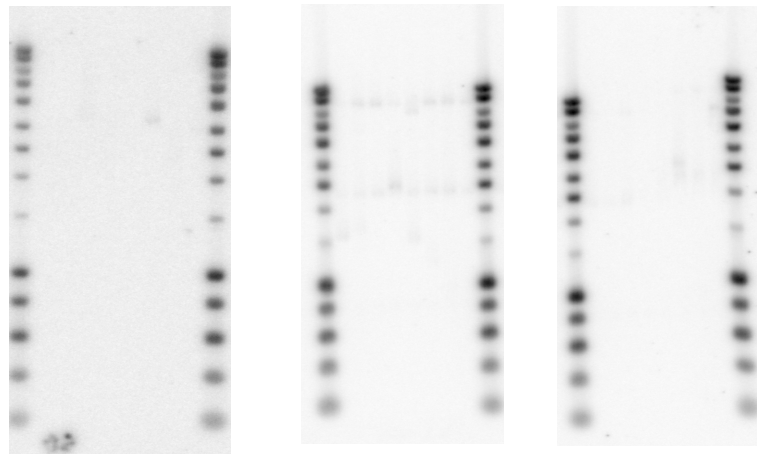

X probe

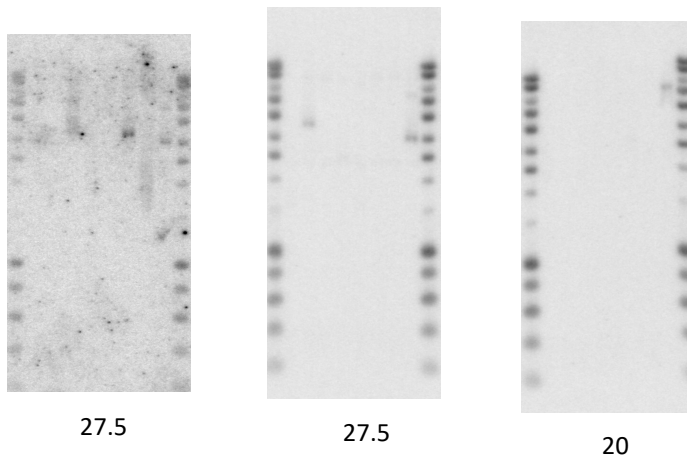

# Figure 4

a

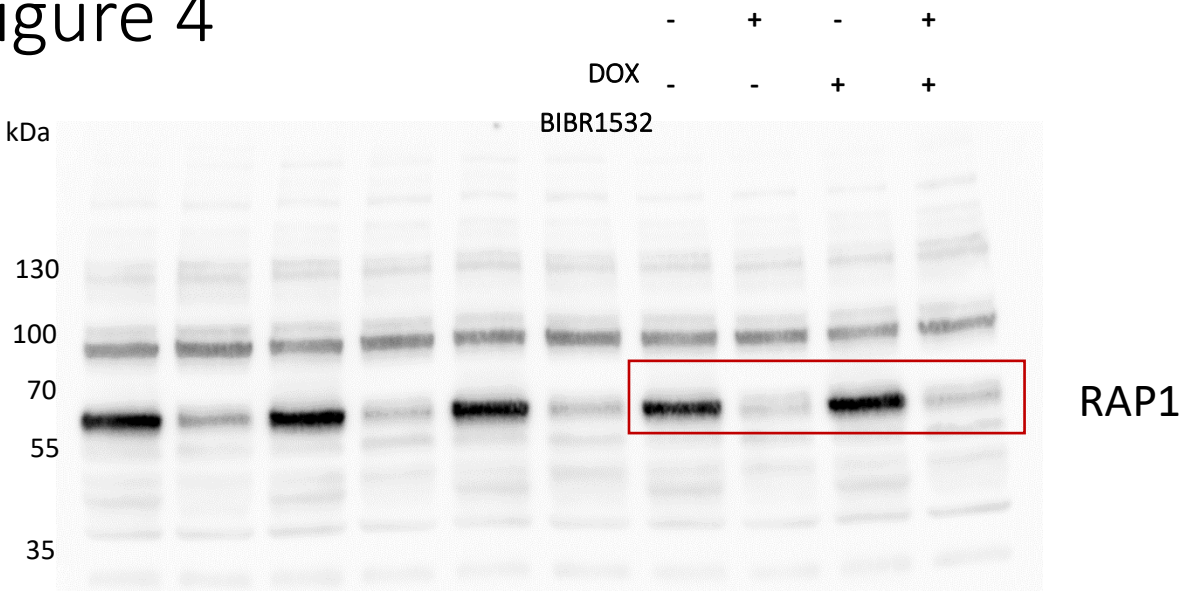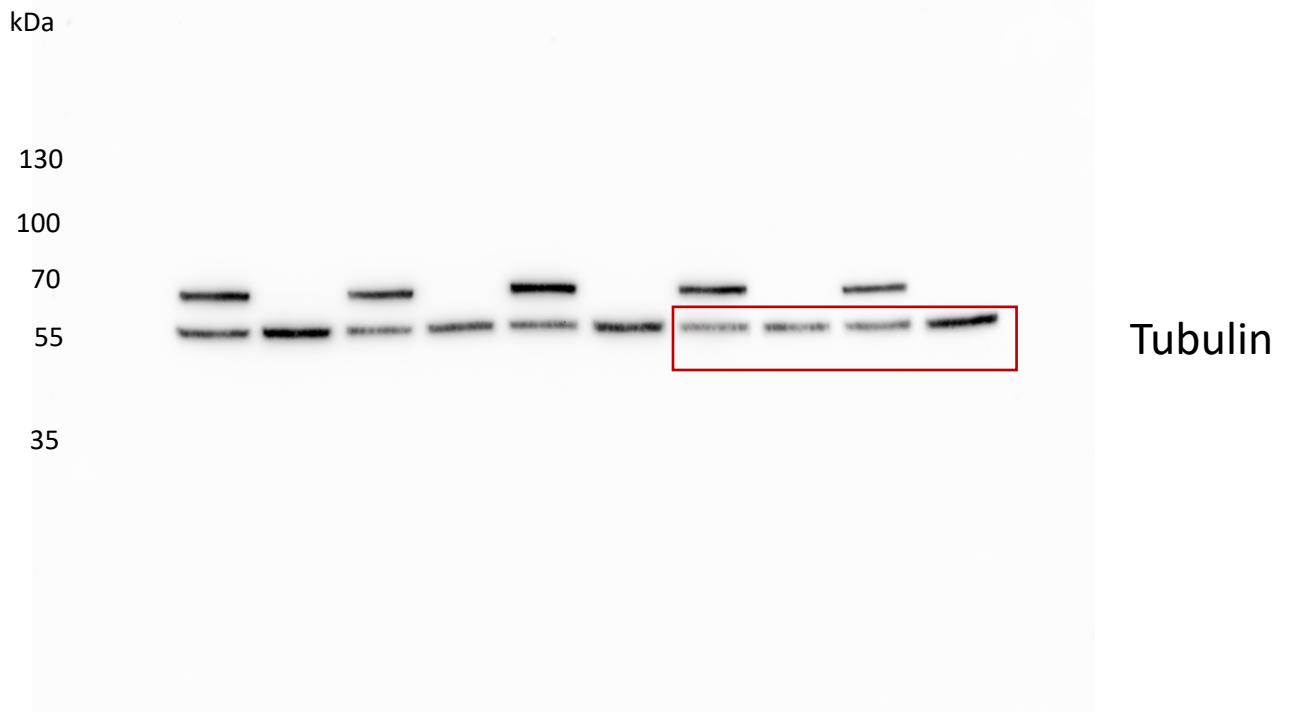



# Figure 4

C

Replicate 1

Replicate 2

16 probe  
DMSO -DOX

DMSO +DOX

BIBR -DOX

BIBR +DOX

BIBR -DOX

BIBR +DOX

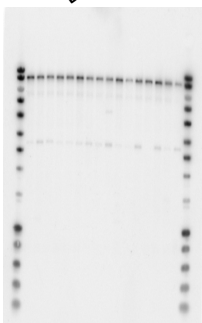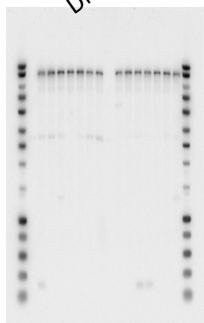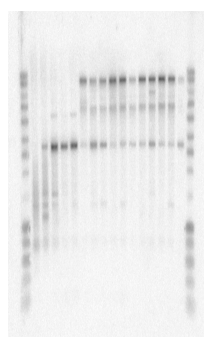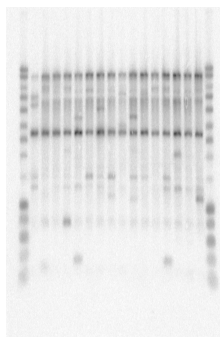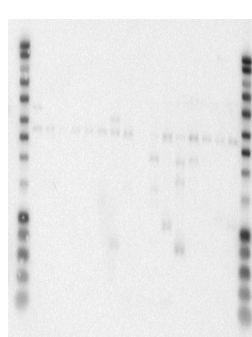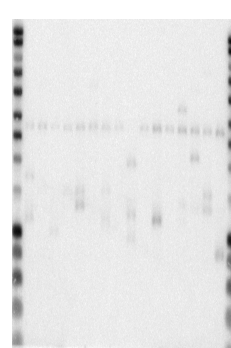

X probe

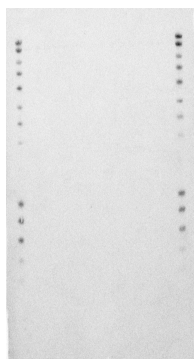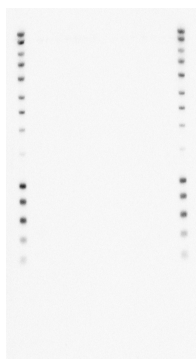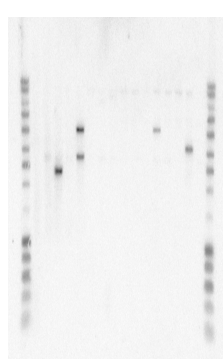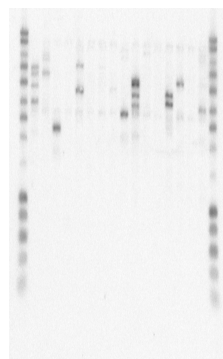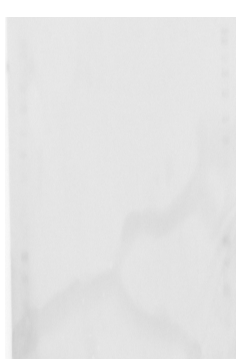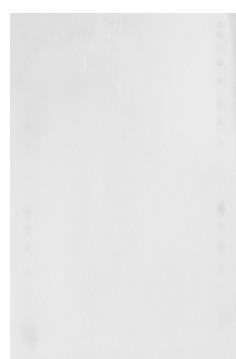

21 probe

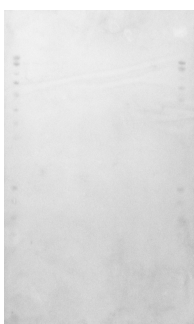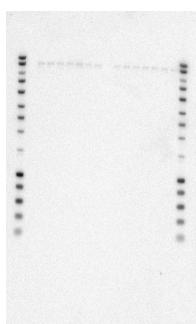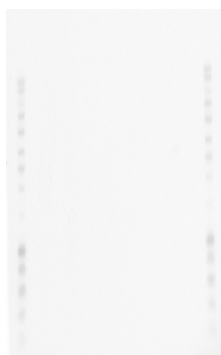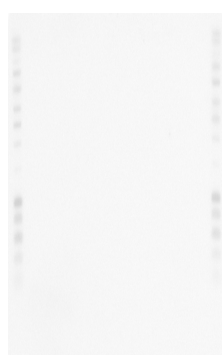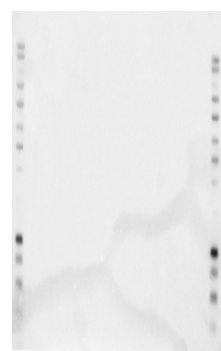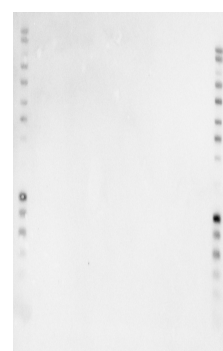

6

8

21

48

17

32

# Figure 4

## c Replicate 1

16 probe

+BIBR +DOX+shControl

+BIBR -DOX+shLIG4

+BIBR +DOX+shLIG3

+BIBR +DOX+shLIG4

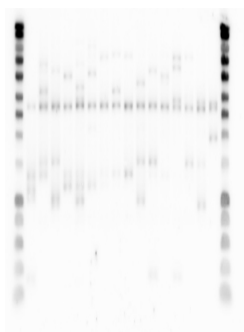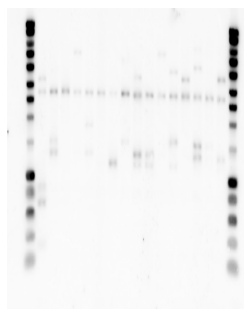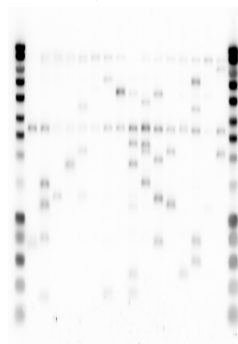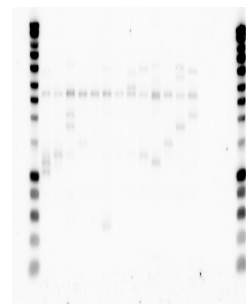

X probe

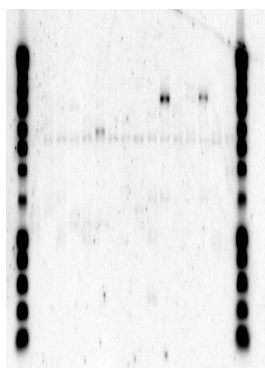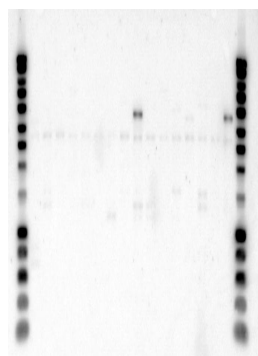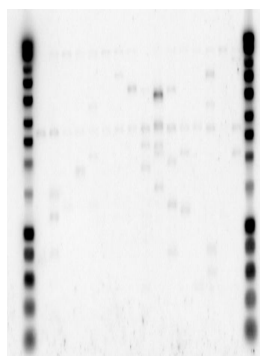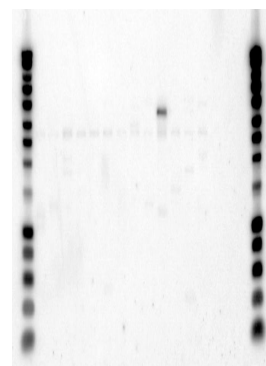

21 probe

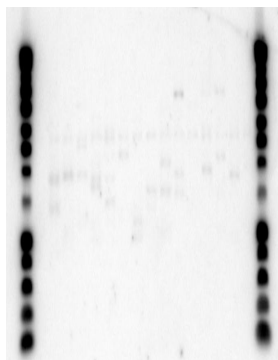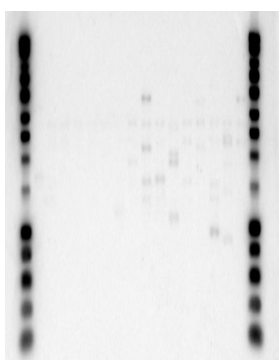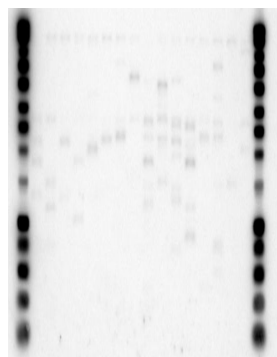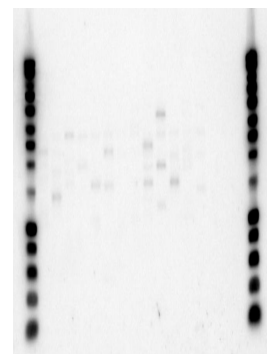

39

22

45

24

# Figure 4

## c Replicate 1

21 probe

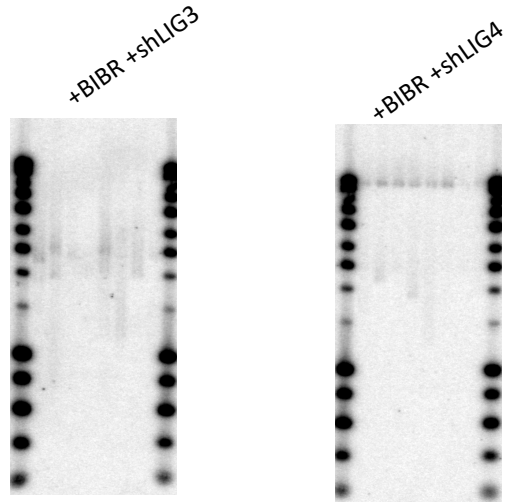

X probe

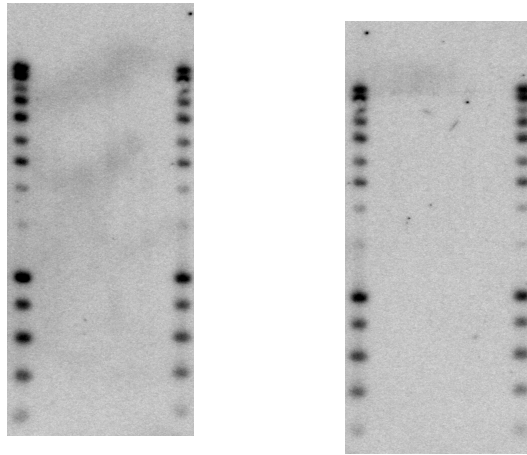

16 probe

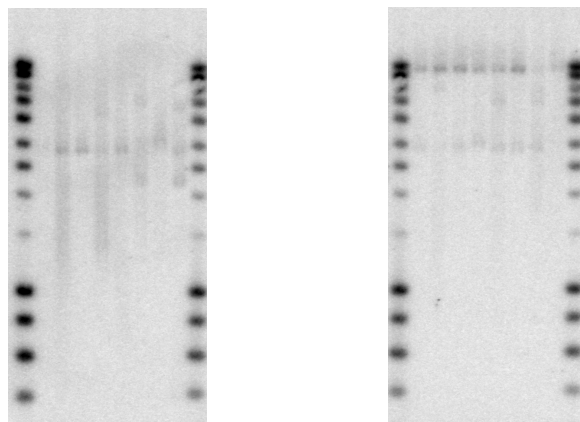

# Figure 4

## c Replicate 2

21 probe

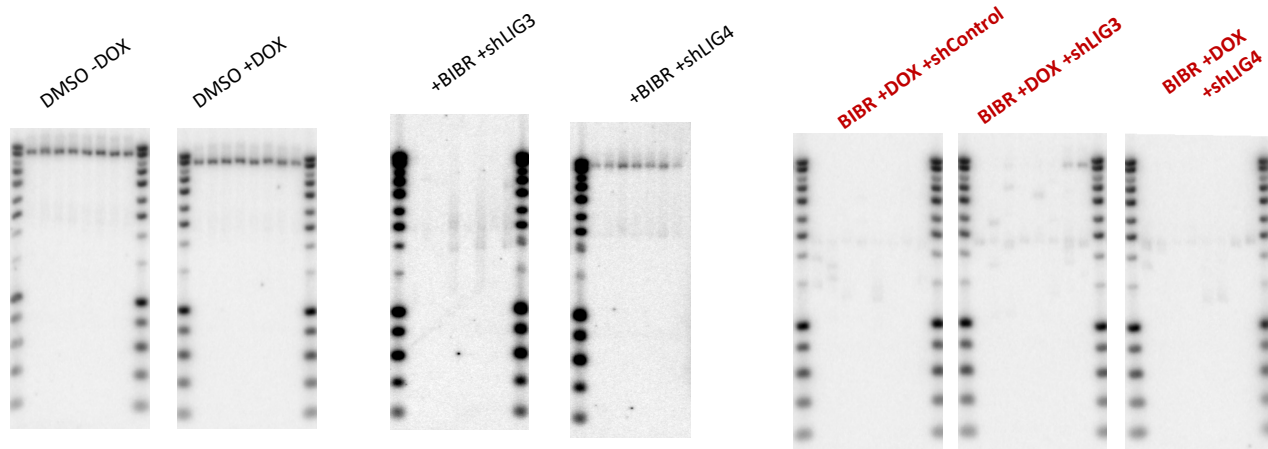

X probe

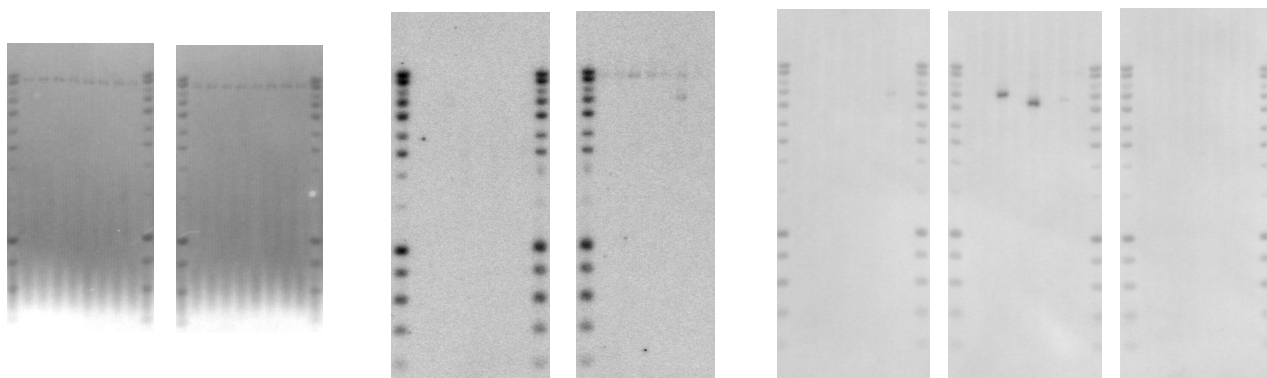

16 probe

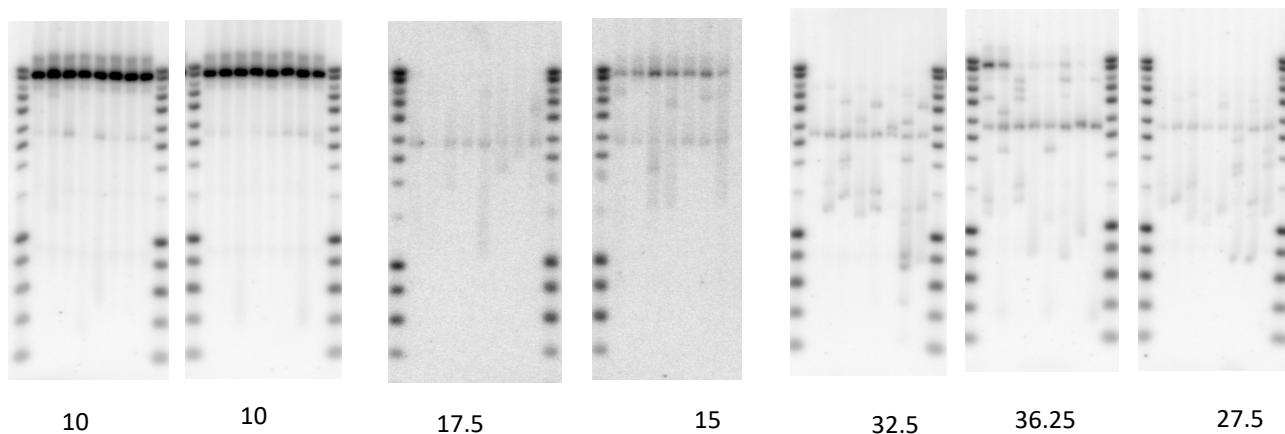

100 ng of DNA per PCR reaction

# Figure 4

## C Replicate 3

21 probe  
DMSO -DOX

DMSO +DOX

BIBR -DOX

BIBR +DOX

BIBR +DOX +shControl

BIBR +DOX +shLIG3

BIBR +DOX +shLIG4

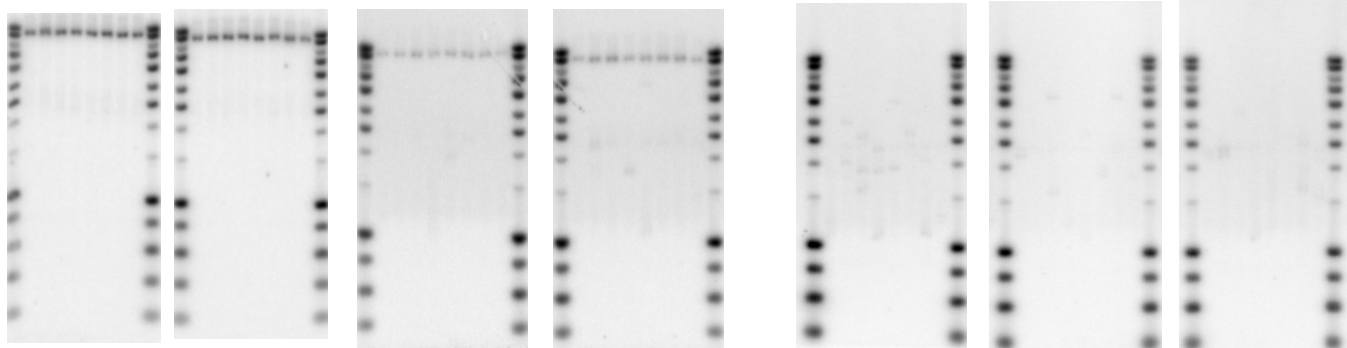

X probe

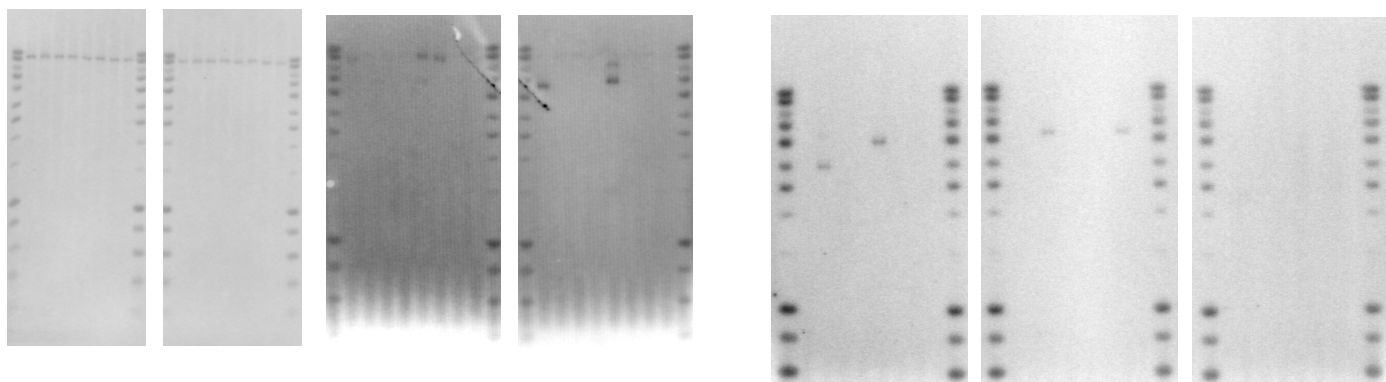

16 probe

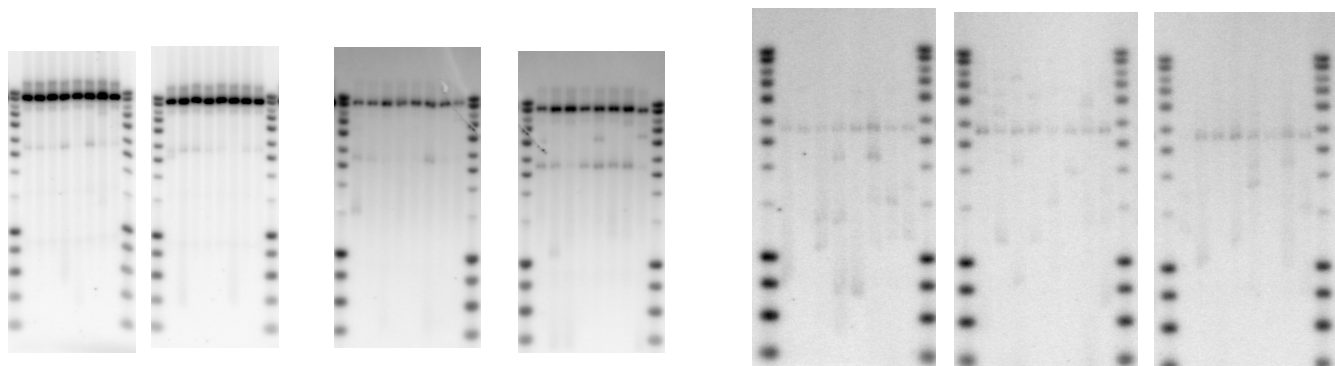

7.5

10

12.5

25

37.5

32.5

22.5

Figure 5

b

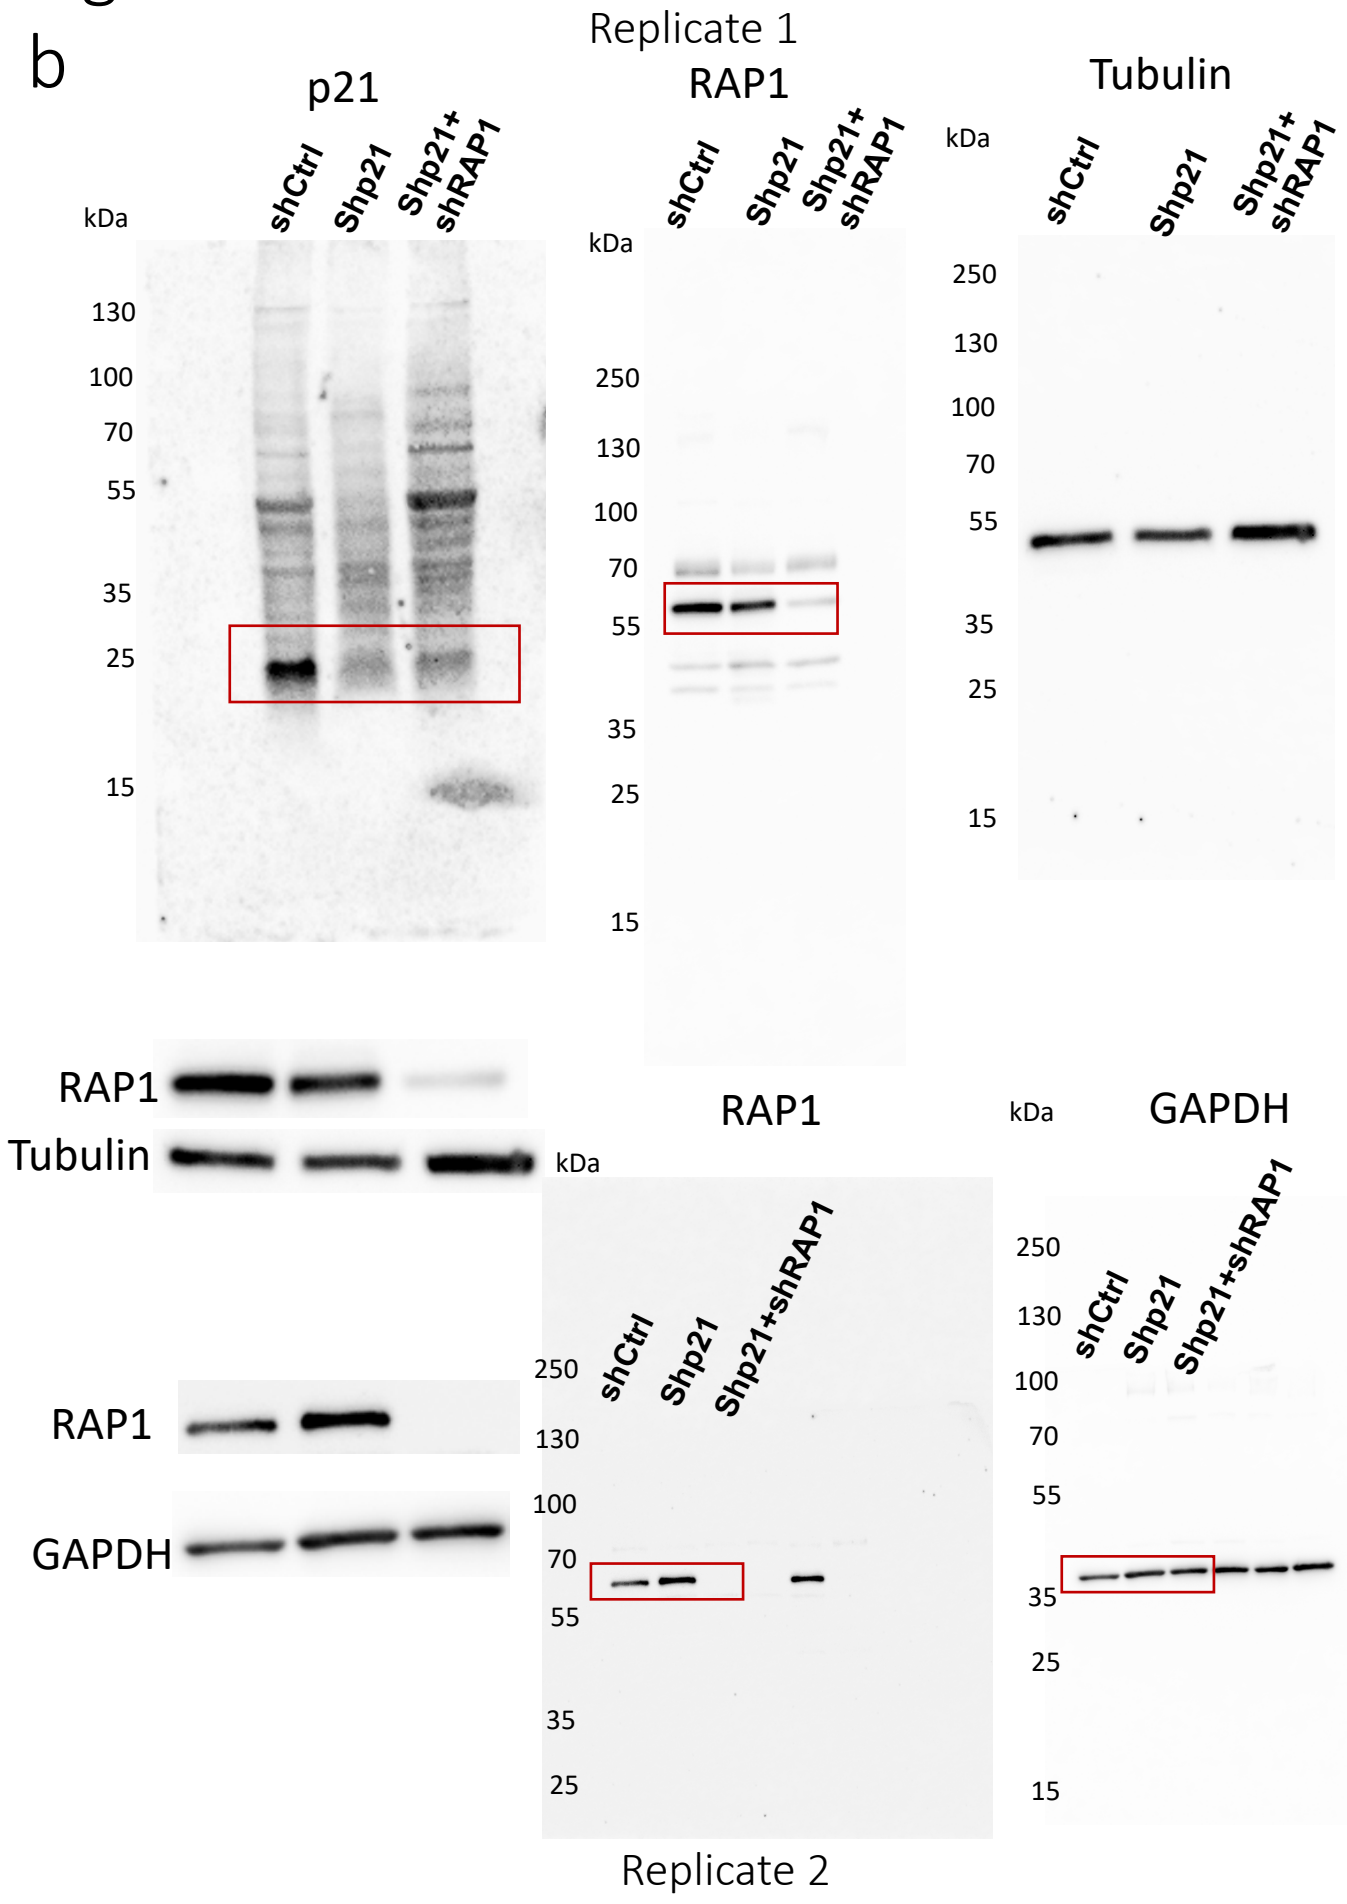

# EVF1

a

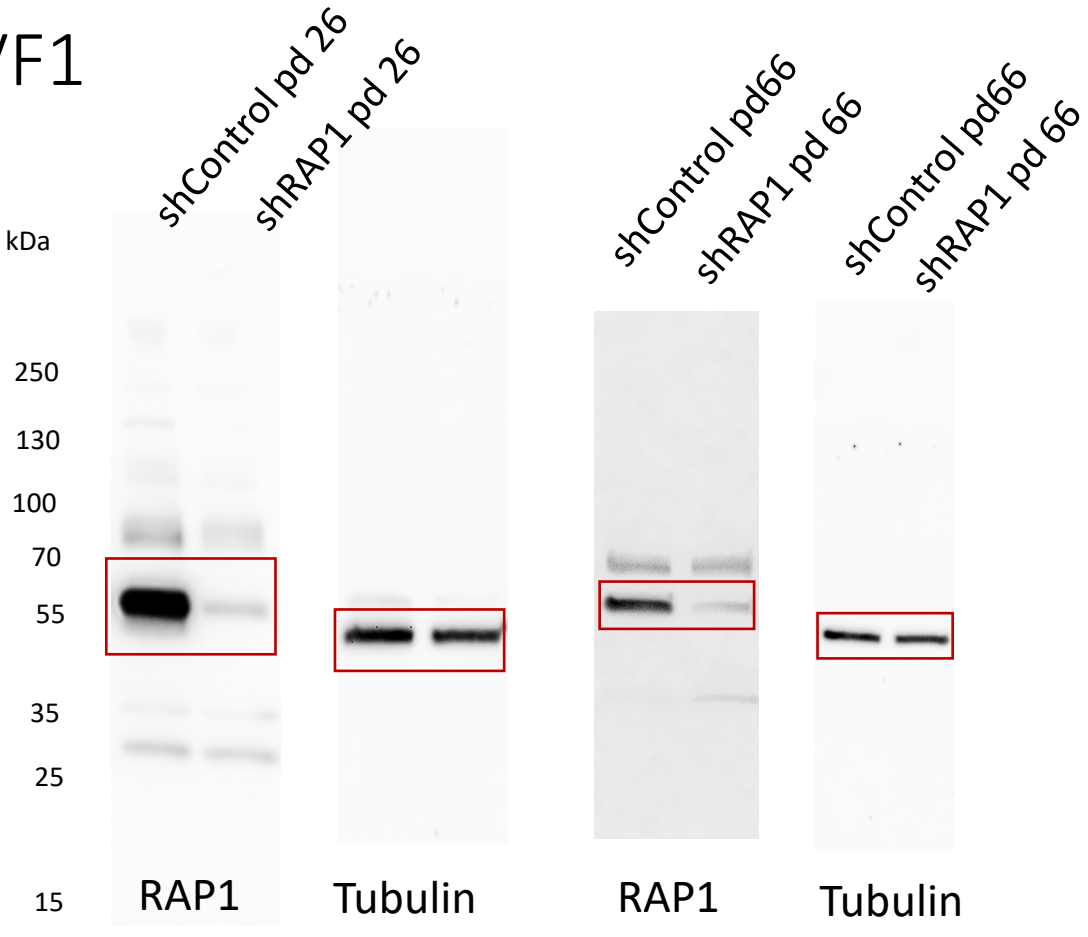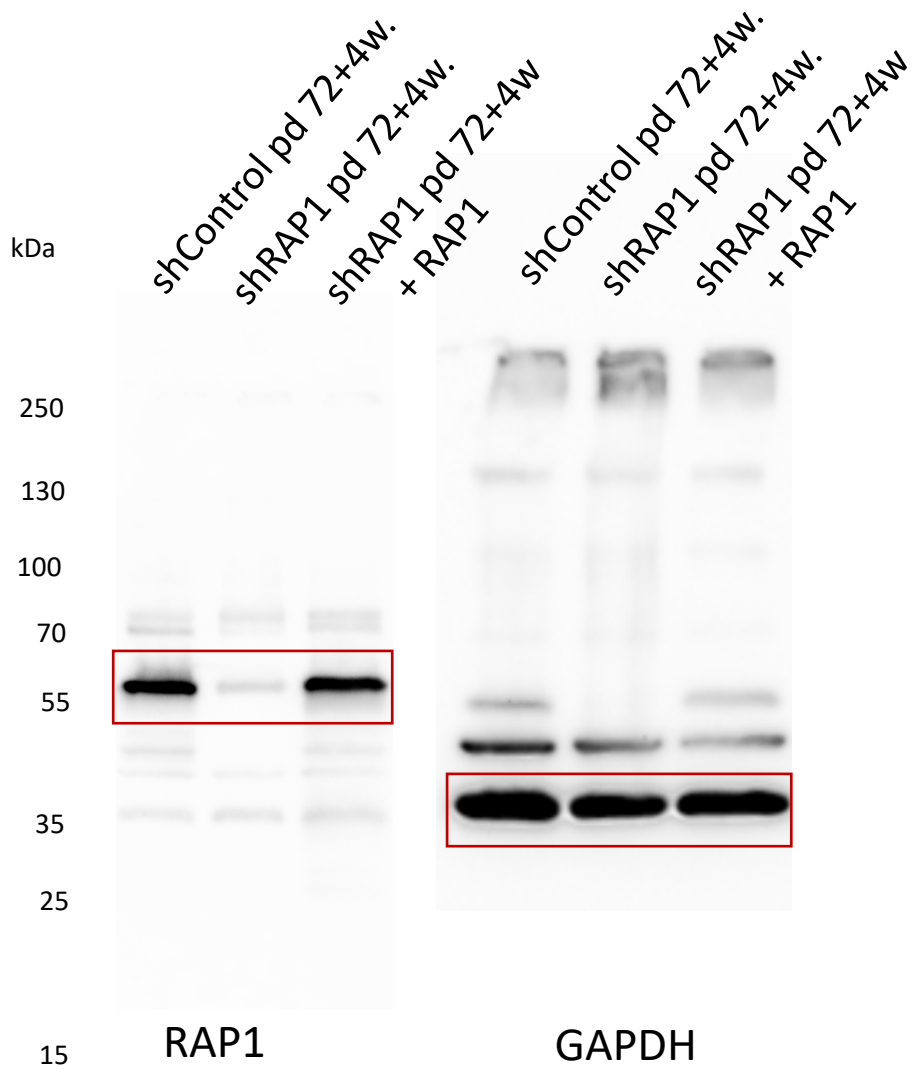

# EVF2

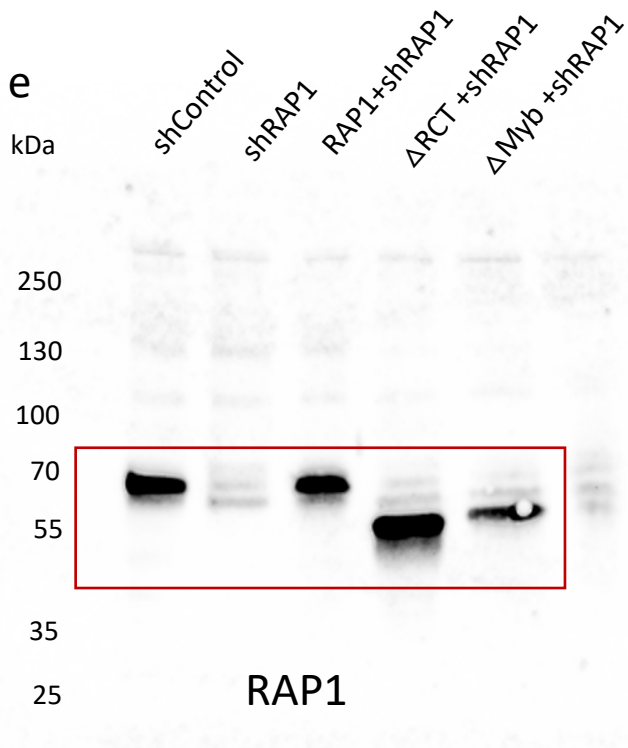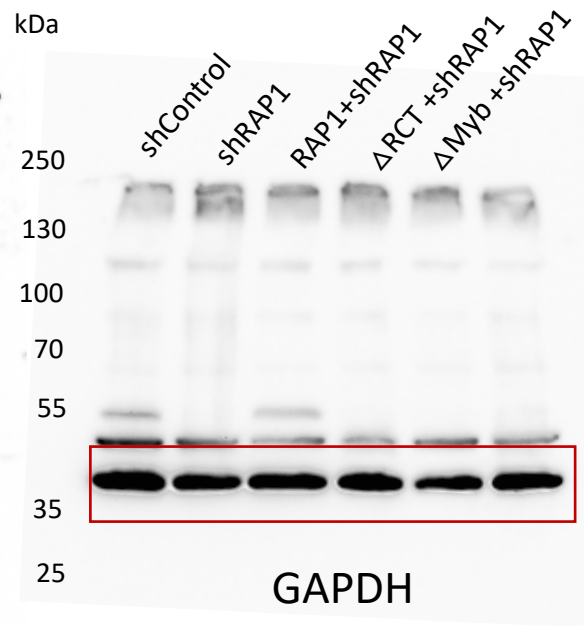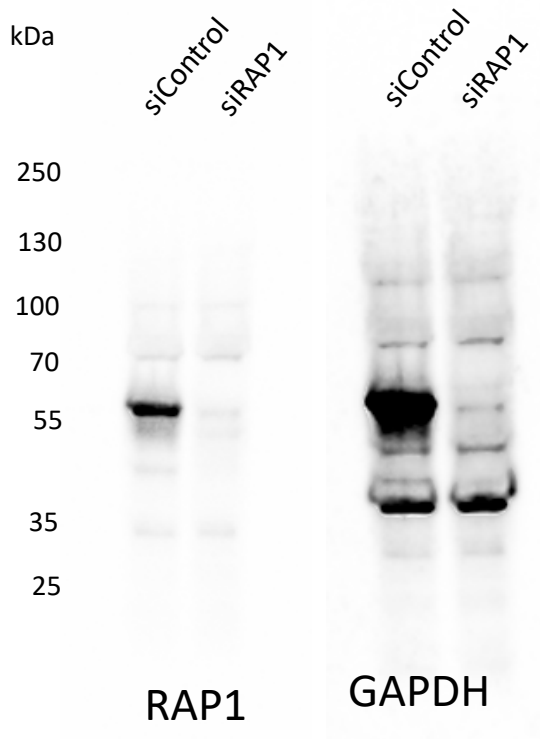



# EVF2

e

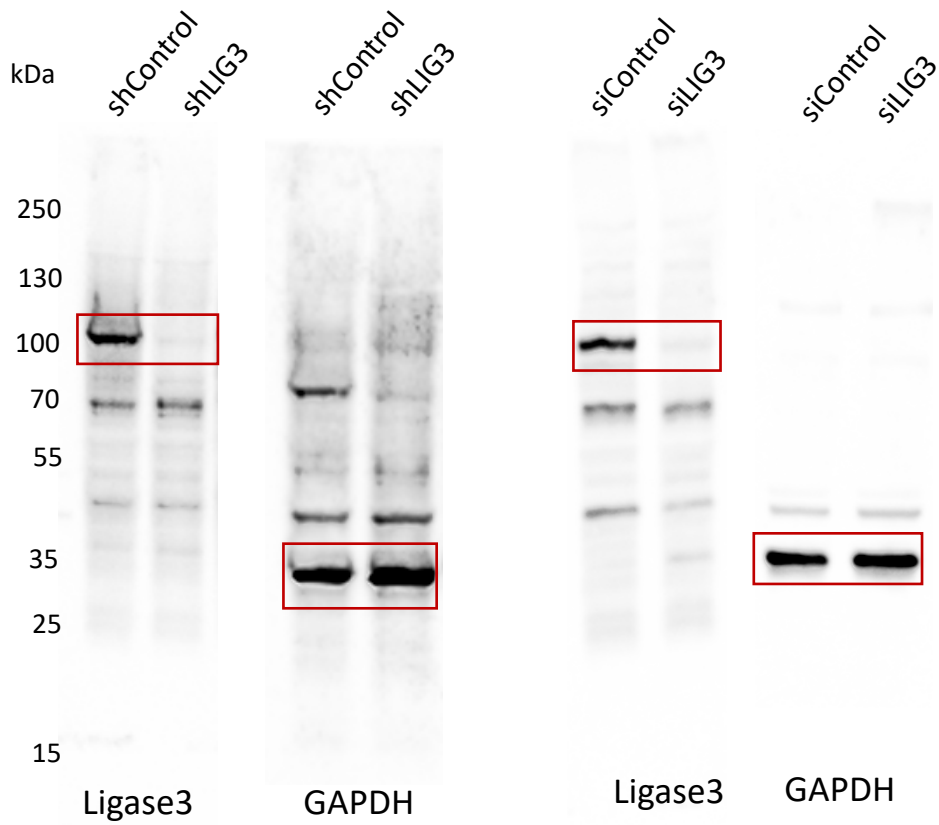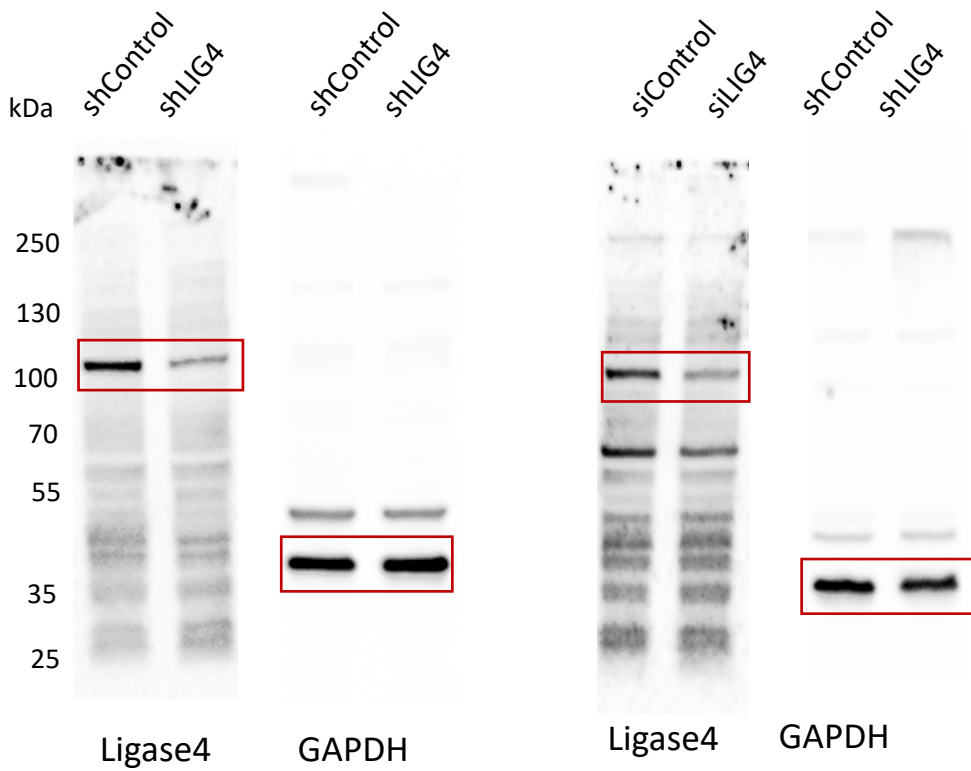

# EVF3

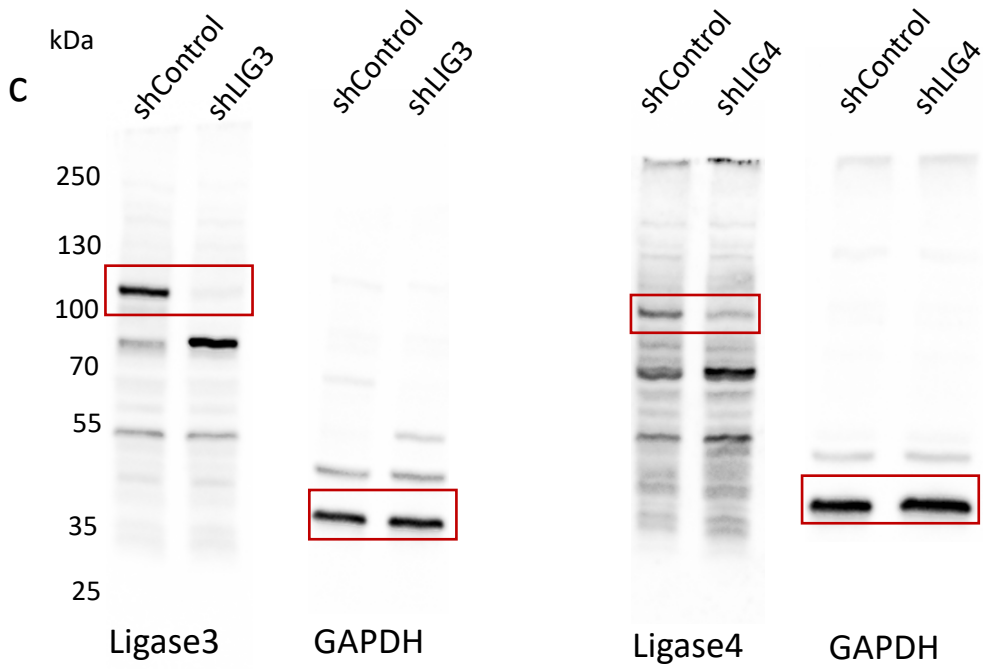

**d**

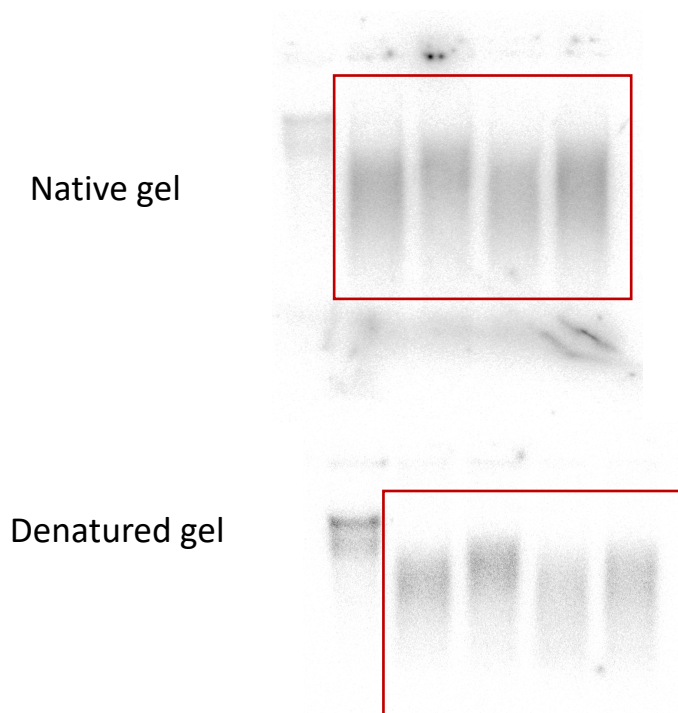

Supplement: EMBR-21-e49076-s003.pdf [file EMBR-21-e49076-s003.pdf]
